# Supplementary material for: A triphenylacrylonitrile phenanthroimidazole cored butterfly shaped AIE chromophore for blue and HLCT sensitized fluorescent OLEDs
Source: Royal Society of Chemistry journal article supplement (doi:10.1039/d2tc00353h), 2022-01-01
Supplement: d2tc00353h1.pdf [file d2tc00353h1.pdf]

## Supporting information

**Triphenylacrylonitrile phenanthroimidazole cored butterfly shaped AIE chromophore  
for blue and HLCT sensitized fluorescent OLEDs**

**Jayaraman Jayabharathi\*, Shanmugam Thilagavathy, Venugopal Thanikachalam,  
Jagathratchagan Anudeebhana**

*Department of Chemistry, Annamalai University, Annamalai nagar, Tamilnadu- 608 002,  
India*

\* Address for correspondence

Dr. J. Jayabharathi  
Professor of Chemistry  
Department of Chemistry  
Annamalai University  
Annamalai nagar 608 002  
Tamilnadu, India.  
Tel: +91 9443940735  
E-mail: jtchalam2005@yahoo.co.in

## **Contents**

**SI-I. General information and measurements**

**SI-II. Experimental Section**

**SI-III. Charge-Transfer Indexes**

**SI-IV. Solvatochromism for HLCT character**

**SI-V. Performances of single carrier devices**

**SI-VI. Tables**

### SI-I. (i) General Information and measurements

All the reagents and solvents were purchased from commercial sources and used as received. The emitters were subjected to sublimation to enhance the purity before photoluminescence and electroluminescence investigations.  $^1\text{H}$  and  $^{13}\text{C}$  NMR spectra were recorded at room temperature on Bruker 400 spectrometer in  $\text{CD}_2\text{Cl}_2$ . The mass spectra were recorded on Agilent LCMS VL SD. The UV-Vis spectra were recorded on Lambda 35 PerkinElmer (solution)/ Lambda 35 spectrophotometer (RSA-PE-20) (film). The emission spectra were recorded with Perkin Elmer LS55 spectrometer and quantum yield was measured with fluorescence spectrometer (Model-F7100 with integrating sphere). The decomposition temperature ( $T_d$ ) and glass transition temperature ( $T_g$ ) were measured with NETZSCH (DSC-204) ( $10^\circ \text{C min}^{-1}$ ;  $\text{N}_2$  atmosphere), respectively. Fluorescence lifetime was estimated by time correlated single-photon counting (TCSPC) method on Horiba Fluorocube-01-NL lifetime system: nano LED is an excitation source with TBX-PS is detector; DAS6 software was employed to analyse the decay by reconvolution method. The absolute quantum yield (PLQY) was determined with fluorescence spectrometer Model-F7100. The quantum yield ( $\phi$ ) was measured in dichloromethane with 0.5 M  $\text{H}_2\text{SO}_4$  solution of quinine (0.54) as reference and calculated using the following equation:  $\phi_{\text{unk}} = \phi_{\text{std}} \left( \frac{I_{\text{unk}}}{I_{\text{std}}} \right) \left( \frac{A_{\text{std}}}{A_{\text{unk}}} \right) \left( \frac{\eta_{\text{unk}}}{\eta_{\text{std}}} \right)^2$ , where  $\phi_{\text{unk}}$  and  $\phi_{\text{std}}$  are the quantum yield of the sample and standard respectively.  $I_{\text{unk}}$  and  $I_{\text{std}}$  are the integrated emission intensities of the sample and standard, respectively.  $\eta_{\text{unk}}$  and  $\eta_{\text{std}}$  are the refractive indices of the sample and standard solution and  $A_{\text{unk}}$  and  $A_{\text{std}}$  are the absorbance of the sample and standard, respectively. The quantum yield of thin materials in film has been measured on quartz plate using an integrating sphere [1]. The cyclic voltammetry measurement was carried out in deoxygenated dichloromethane (DCM) with 0.1 M tetrabutylammonium hexafluorophosphate (TBAP) as supporting electrolyte in a three electrode system using BioLogic SP200

potentiostat (BioLogic, France) at room temperature using platinum wire as auxiliary electrode, glass carbon disk as working electrode and  $\text{Ag}/\text{Ag}^+$  as reference electrode standardized by the redox couple ferrocenium/ferrocene. All solutions were purged with a nitrogen stream for 10 min. before measurement. The procedure was performed at room temperature, and a nitrogen atmosphere was maintained over the solution during measurements. All density functional theory (DFT) calculations were carried out using Gaussian 09 package [2] and Multiwfn [2]. The ground-state ( $S_0$ ) geometries in the gas phase were initially optimized at the level of B3LYP/6-31G (d, p), a commonly used level for the precise geometry optimization. Then, geometry optimization and excited-state properties based on  $S_1$  geometries were studied using time-dependent DFT (TD-DFT) at the same level. The natural transition orbitals (HONTOs and LUNTOs) with hole-particle contribution, transition density matrix and overlap integral have been studied in detail [3-5].

## **(ii) OLEDs fabrication and measurement**

ITO glass (resistance  $20 \text{ } \Omega/\text{sq}$ ) were cleaned with acetone, deionized water and isopropanol and dried ( $120 \text{ } ^\circ\text{C}$ ) followed by UV-zone treatment (20 min) and transferred into deposition system. The devices were fabricated by multiple source beam deposition method (vacuum pressure -  $4 \times 10^{-5} \text{ mbar}$ ). Evaporation rate of  $2\text{-}4 \text{ } \text{Å s}^{-1}$  (organic materials) and  $0.1$  and  $4 \text{ } \text{Å s}^{-1}$  for LiF and metal electrodes were applied, respectively. The thickness of each decomposition layer was monitored with quartz crystal thickness monitor. The EL measurement was recorded with USB-650-VIS-NIR spectrometer (Ocean Optics, Inc, USA). The current density-voltage-luminance (J-V-L) characteristics were performed using source meter (Keithley 2450) equipped with LS-110 light intensity meter. The external quantum efficiency was determined from luminance, current density and EL spectrum assuming Lambertian distribution.

## SI-II. Experimental Section

### Materials

The chemicals used in the experimental section were obtained from Sigma-Aldrich.

Synthetic route of the emissive materials were outlined in Scheme S1.

### Scheme S1. Synthetic route for blue emitters.

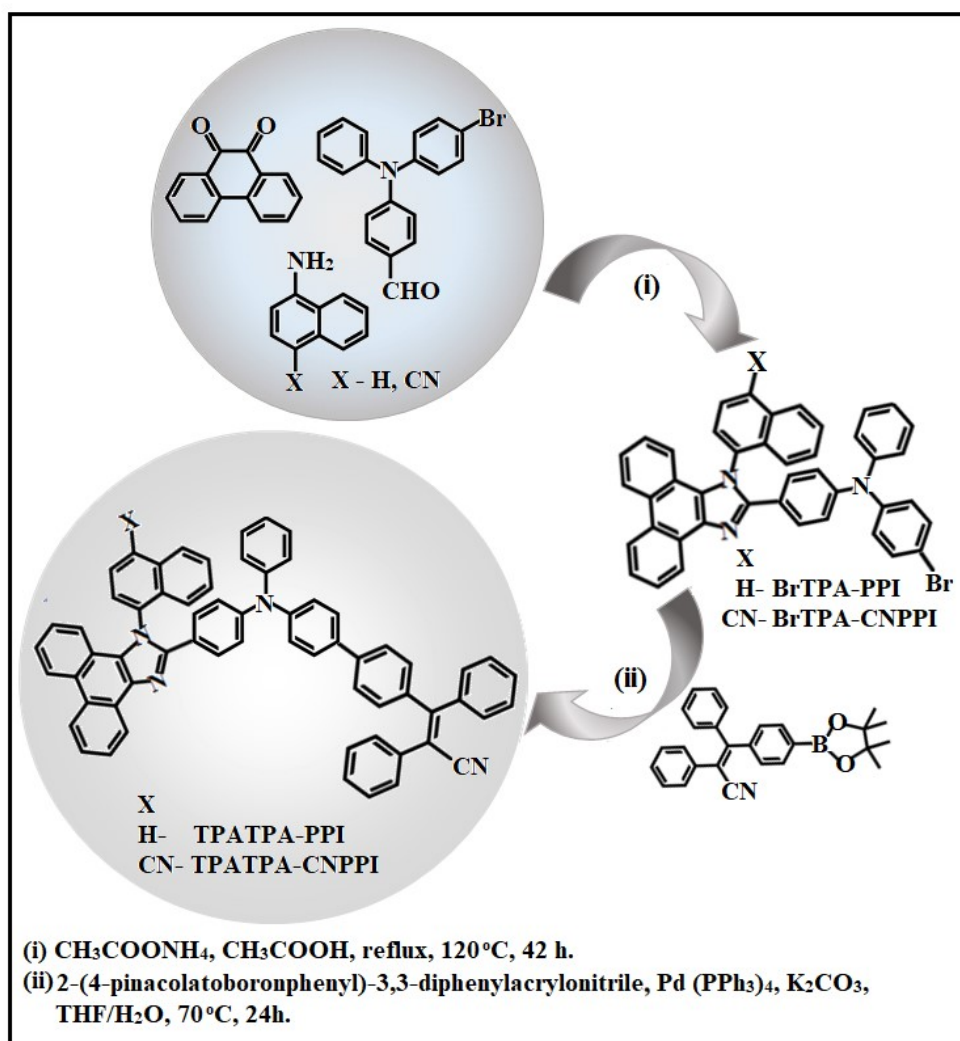

Plate S1.  $^1\text{H}$  NMR spectrum of N-(4-(1-(naphthalen-1-yl)-1H-phenanthro[9,10-d]imidazol-2-yl)phenyl)-N-phenyl-4'-(1,2,2-diphenylvinylacrylonitrile)-[1,1'-biphenyl]-4-amine (TPATPA-PPI).

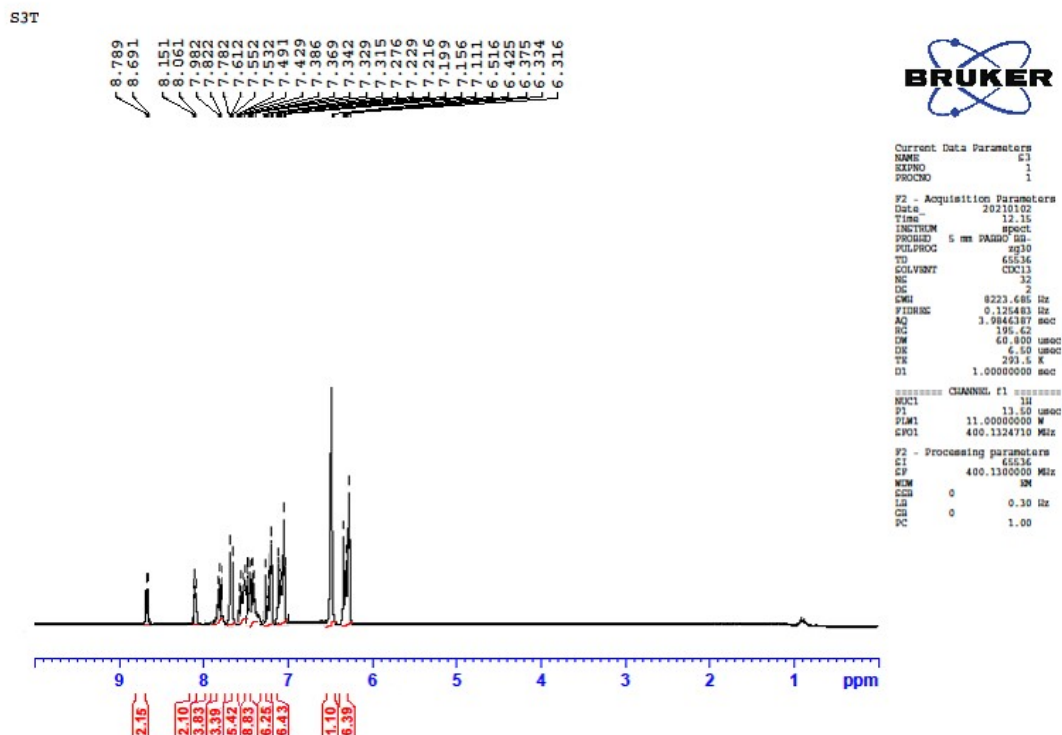

Plate S2.  $^1\text{H}$  NMR spectrum of 4-(2-(4-(phenyl(4'-(1,2,2-diphenylvinylacrylonitrile)-[1,1'-biphenyl]-4-yl)amino)phenyl)-1H-phenanthro[9,10-d]imidazol-1-yl)-1-naphthonitrile (TPATPA-CNPI)

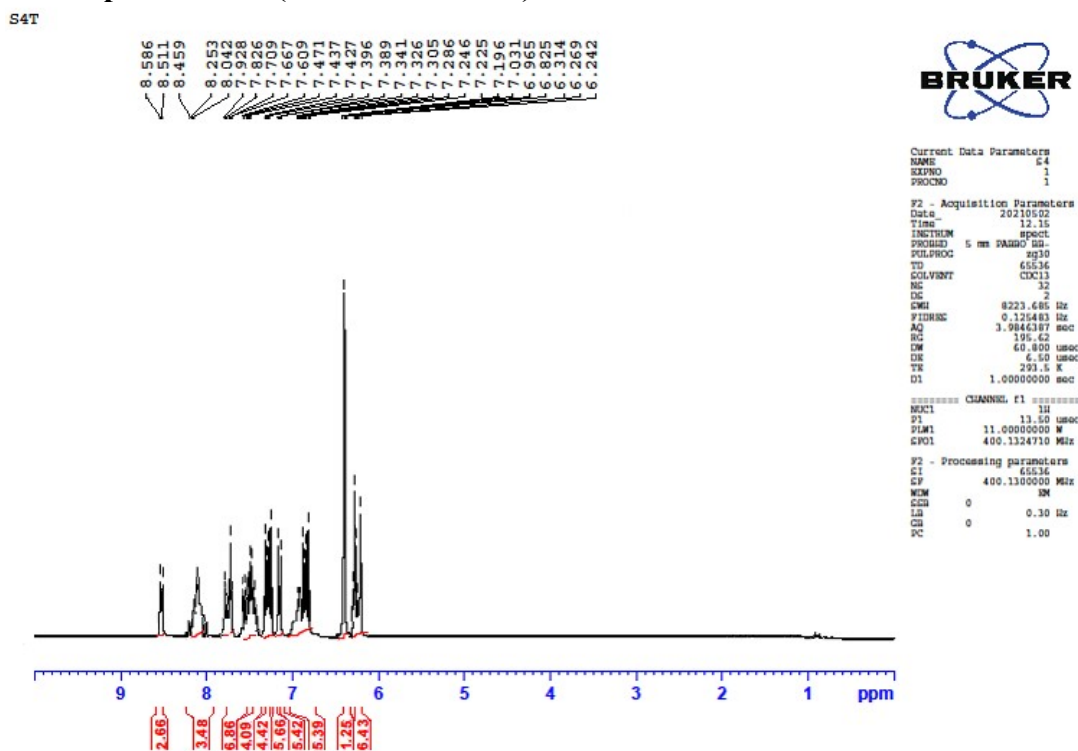

## Synthesis

### (a) 4-bromo-N-(4-(1-(naphthalen-1-yl)-1H-phenanthro[9,10-d]imidazol-2-yl)phenyl)-N-phenylaniline (BrTPA-PPI)

A mixture of 9,10-phenanthrenequinone (2.54 mmol), 4-(N-(4-bromophenyl)-N-phenylamino) benzaldehyde (2.80 mmol), ammonium acetate (25.4 mmol) and naphthalen-1-amine (3.04 mmol) in acetic acid (10 mL) was refluxed with stirring for 42 h (120°C; N<sub>2</sub>). The resulting solid was filtered, washed and dried. Yield: 70%. <sup>1</sup>H NMR (400 MHz; CDCl<sub>3</sub>; δ, ppm): 6.15 (d, 2H), 6.23-6.49 (m, 4H), 6.52 (s, 1H), 6.87 (d, 2H), 6.91-7.10 (m, 4H), 7.18-7.27 (m, 4H), 7.30-7.68 (d, 3H), 7.72-7.80 (m, 4H), 8.12-8.22 (m, 4H). <sup>13</sup>C NMR (100 MHz; CDCl<sub>3</sub>; δ, ppm): 107.0, 112.6, 120.0, 123.0, 124.4, 125.8, 126.0, 127.7, 129.2, 132.0, 133.7, 141.4, 144.8. MS: m/z. 666.61 [M<sup>+</sup>]; Calcd. 663.91.

### (b) 4-(2-(4-((4-bromophenyl)(phenyl)amino)phenyl)-1H-phenanthro[9,10-d]imidazol-1-yl)-1-naphthonitrile (BrTPA-CNPPI)

A mixture of 9,10-phenanthrenequinone (2.54 mmol), 4-(N-(4-bromophenyl)-N-phenylamino) benzaldehyde (2.80 mmol), ammonium acetate (25.4 mmol) and 4-aminonaphthalen-1-carbonitrile (4.32 mmol) in acetic acid (10 mL) was refluxed with continuous stirring for 42 h (120 °C; N<sub>2</sub>). The resulting solid was filtered and dried. Yield: 68%. <sup>1</sup>H NMR (400 MHz; CDCl<sub>3</sub>; δ, ppm): 6.21 (d, 2H), 6.35-6.49 (m, 4H), 6.59 (s, 1H), 7.04 (d, 2H), 7.10-7.18 (m, 4H), 7.32 (s, 1H), 7.51-7.64 (d, 2H), 7.69-7.80 (d, 2H), 7.81-7.95 (m, 4H), 8.30 (d, 3H), 8.89 (d, 2H). <sup>13</sup>C NMR (100 MHz; CDCl<sub>3</sub>; δ, ppm): 101.7, 104.3, 111.2, 116.2, 117.4, 119.1, 120.0, 121.3, 124.1, 125.1, 126.0, 130.2, 132.7, 137.8, 139.8, 141.3. MS: m/z. 691.62 [M<sup>+</sup>]; Calcd. 690.81.

**(c) N-(4-(1-(naphthalen-1-yl)-1H-phenanthro[9,10-d]imidazol-2-yl)phenyl)-N-phenyl-4'-(1,2,2-diphenylvinylacrylonitrile)-[1,1'-biphenyl]-4-amine (TPATPA-PPI)**

A mixture of Pd(PPh<sub>3</sub>)<sub>4</sub> (0.04 mmol), BrTPA-PPI (0.4 mmol), 4-(1,2,2-triphenylvinyl)phenylboronic acid pinacol ester (0.52 mmol) and K<sub>2</sub>CO<sub>3</sub> (2.0 mmol) in a mixture of ethanol (8.0 mL), toluene (24.0 mL) and H<sub>2</sub>O (4.0 mL) was refluxed (70°C; N<sub>2</sub>; 24h). The crude was purified by column chromatography. Yield: 65%. <sup>1</sup>H NMR (400 MHz, CDCl<sub>3</sub>, δ, ppm): 6.31-6.42 (m, 6H), 6.51 (s, 1H), 7.11-7.19 (m, 6H), 7.21-7.31 (m, 6H), 7.32-7.42 (m, 8H), 7.49-7.55 (m, 5H), 7.61-7.78 (d, 3H), 7.82-7.98 (m, 3H), 8.10 (d, 2H), 8.73 (d, 2H). <sup>13</sup>C NMR (100 MHz, CDCl<sub>3</sub>, δ, ppm): 107.9, 109.7, 113.8, 120.4, 122.4, 124.1, 126.1, 126.4, 127.7, 128.0, 129.4, 129.9, 130.9, 132.9, 134.5, 135.6, 137.9, 139.5, 140.1, 147.4. MS: m/z. 867.05 [M<sup>+</sup>]; Calcd. 866.71. Anal. Calcd (%) for C<sub>64</sub>H<sub>42</sub>N<sub>4</sub>: C, 88.66; H, 4.88; N, 6.46. Found: C, 88.42; H, 4.80; N, 6.40.

**(d) 4-(2-(4-(phenyl(4'-(1,2,2-diphenylvinylacrylonitrile)-[1,1'-biphenyl]-4-yl)amino) phenyl)-1H-phenanthro[9,10-d]imidazol-1-yl)-1-naphthonitrile (TPATPA-CNPPI)**

A mixture of Pd(PPh<sub>3</sub>)<sub>4</sub> (0.04 mmol), BrTPA-CNPPI (0.4 mmol), 4-(1,2,2-triphenylvinyl)phenylboronic acid pinacol ester (0.52 mmol) and K<sub>2</sub>CO<sub>3</sub> (2.0 mmol) in a mixture of ethanol (8.0 mL), toluene (24.0 mL) and H<sub>2</sub>O (4.0 mL) was refluxed (70 °C; N<sub>2</sub>; 24h). The crude was purified by column chromatography. Yield: 60%. <sup>1</sup>H NMR (400 MHz; CDCl<sub>3</sub>; δ, ppm): 6.24 (m, 6H), 6.31 (s, 1H), 6.82-7.19 (m, 5H), 7.22-7.30 (m, 5H), 7.32-7.38 (m, 5H), 7.39-7.42 (m, 4H), 7.43-7.60 (m, 4H), 7.66-7.92 (m, 6H), 8.04-8.45 (m, 3H), 8.51-8.58 (d, 2H). <sup>13</sup>C NMR (100 MHz; CDCl<sub>3</sub>; δ, ppm): 105.7, 107.5, 111.8, 119.7, 120.2, 123.8, 125.1, 126.8, 127.9, 128.5, 128.8, 129.5, 130.9, 131.5, 134.7, 137.8, 139.9, 140.9, 143.0, 145.6. MS: m/z. 892.05 [M<sup>+</sup>]; Calcd. 891.74. Anal. Calcd (%) for C<sub>65</sub>H<sub>41</sub>N<sub>5</sub>: C, 87.52; H, 4.63; N, 7.85. Found: C, 87.42; H, 4.57; N, 7.79.



### SI-III. Charge-Transfer Indexes

The hole-particle pair interactions have been related to the distance covered during the excitations: one possible descriptor  $\Delta r$  index could be used to calculate the average distance which is weighted in function of the excitation coefficients.

$$\Delta r = \frac{\sum_{ia} k_{ia}^2 |\langle \varphi_a | r | \varphi_a \rangle - \langle \varphi_i | r | \varphi_i \rangle|}{\sum_{ia} K_{ia}^2} \dots\dots\dots (S1)$$

where  $|\langle \varphi_i | r | \varphi_i \rangle|$  is the norm of the orbital centroid [6–9].  $\Delta r$  index will be expressed in Å.

The density variation associated to the electronic transition is given by

$$\Delta \rho(r) = \rho_{EX}(r) - \rho_{GS}(r) \dots\dots\dots (S2)$$

where  $\rho_{GS}(r)$  and  $\rho_{EX}(r)$  are the electron densities of the ground and excited states, respectively. Two functions,  $\rho_+(r)$  and  $\rho_-(r)$  corresponds to the points in space where an increment or a depletion of the density upon absorption is produced and they can be defined as follows:

$$\rho_+(r) = \begin{cases} \Delta \rho(r) & \text{if } \Delta \rho(r) > 0 \\ 0 & \text{if } \Delta \rho(r) < 0 \end{cases} \dots\dots\dots (S3)$$

$$\rho_-(r) = \begin{cases} \Delta \rho(r) & \text{if } \Delta \rho(r) < 0 \\ 0 & \text{if } \Delta \rho(r) > 0 \end{cases} \dots\dots\dots (S4)$$

The barycenters of the spatial regions  $R_+$  and  $R_-$  are related with  $\rho_+(r)$  and  $\rho_-(r)$  and are shown as,

$$R_+ = \frac{\int r \rho_+(r) dr}{\int \rho_+(r) dr} = (x_+, y_+, z_+) \dots\dots\dots (S5)$$

$$R_- = \frac{\int r \rho_-(r) dr}{\int \rho_-(r) dr} = (x_-, y_-, z_-) \dots\dots\dots (S6)$$

The spatial distance ( $D_{CT}$ ) between the two barycenters ( $R_+$  and  $R_-$ ) electron density distributions can be used to measure the CT excitation length

$$D_{CT} = |R_+ - R_-| \dots\dots\dots (S7)$$

The transferred charge ( $q_{CT}$ ) can be obtained by integrating over all space  $\rho_+ (\rho_-)$ . Variation in dipole moment between the ground and the excited states ( $\mu_{CT}$ ) can be computed by the following relation:

$$\|\mu_{CT}\| = D_{CT} \int \rho_+(r) dr = D_{CT} \int \rho_-(r) dr \dots\dots\dots (S8)$$

$$= D_{CT} q_{CT} \dots\dots\dots (S9)$$

The difference between the dipole moment  $\|\mu_{CT}\|$  have been computed for the ground and excited states ( $\Delta\mu_{ES-GS}$ ). The two centroids of charges ( $C^+/C^-$ ) associated to the positive and negative density regions are calculated as follows. First the root-mean-square deviations along the three axis ( $\sigma_{aj}$ ,  $j = x, y, z$ ;  $a = +$  or  $-$ ) are computed as,

$$\sigma_{a,j} = \sqrt{\frac{\sum_i \rho_a(r_i) (j_i - j_a)^2}{\sum_i \rho_a(r_i)}} \dots\dots\dots (S10)$$

The two centroids ( $C_+$  and  $C_-$ ) are defined as

$$C_+(r) = A_+ e^{\left( -\frac{(x-x_+)^2}{2\sigma_{+x}^2} - \frac{(y-y_+)^2}{2\sigma_{+y}^2} - \frac{(z-z_+)^2}{2\sigma_{+z}^2} \right)} \dots\dots\dots (S11)$$

$$C_-(r) = A_- e^{\left( -\frac{(x-x_-)^2}{2\sigma_{-x}^2} - \frac{(y-y_-)^2}{2\sigma_{-y}^2} - \frac{(z-z_-)^2}{2\sigma_{-z}^2} \right)} \dots\dots\dots (S12)$$

The normalization factors ( $A_+$  and  $A_-$ ) are used to impose the integrated charge on the centroid to be equal to the corresponding density change integrated in the whole space:

$$A_+ = \frac{\int \rho_+(r) dr}{\int e\left(-\frac{(x-x_-)^2}{2\sigma_{+x}^2} - \frac{(y-y_-)^2}{2\sigma_{+y}^2} - \frac{(z-z_-)^2}{2\sigma_{+z}^2}\right) dr} \dots\dots\dots (S13)$$

$$A_- = \frac{\int \rho_-(r) dr}{\int e\left(-\frac{(x-x_-)^2}{2\sigma_{-x}^2} - \frac{(y-y_-)^2}{2\sigma_{-y}^2} - \frac{(z-z_-)^2}{2\sigma_{-z}^2}\right) dr} \dots\dots\dots (S14)$$

H index is defined as half of the sum of the centroids axis along the D–A direction, if the D–A direction is along the X axis, H is defined by the relation:

$$H = \frac{\sigma_{+x} + \sigma_{-x}}{2} \dots\dots\dots (S15)$$

The t index represents the difference between  $D_{CT}$  and H:

$$t = D_{CT} - H \dots\dots\dots (S16)$$

**Figure S1. Natural transition orbital pairs (HONTOs and LUNTOs) with transition character of TPATPA-PPI [ $f$ -oscillator strength and %- weights of hole-particle].**

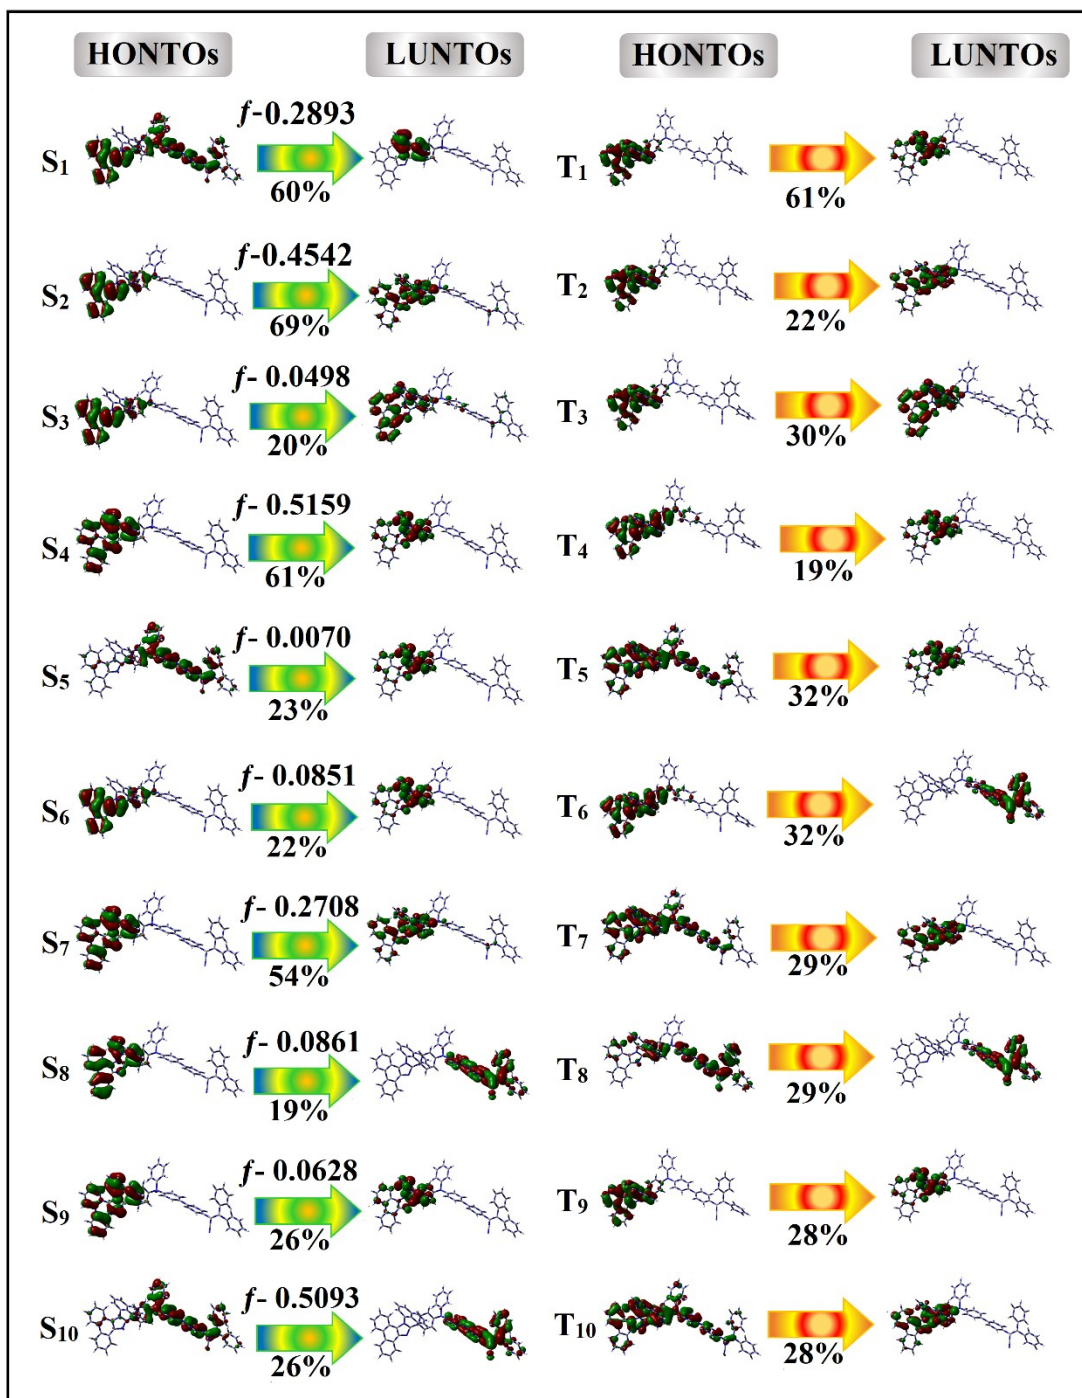

Figure S2. (a) Cyclic voltammogram (100 mV/s) of TPATPA-PPI and TPATPA-CNPPI in dry DCM using 0.1 M TBAP as supporting electrolyte; Normalised absorption spectra of TPATPA-PPI (b) and TPATPA-CNPPI(c) in THF-H<sub>2</sub>O with different water fractions and (d) ML and PL spectra.

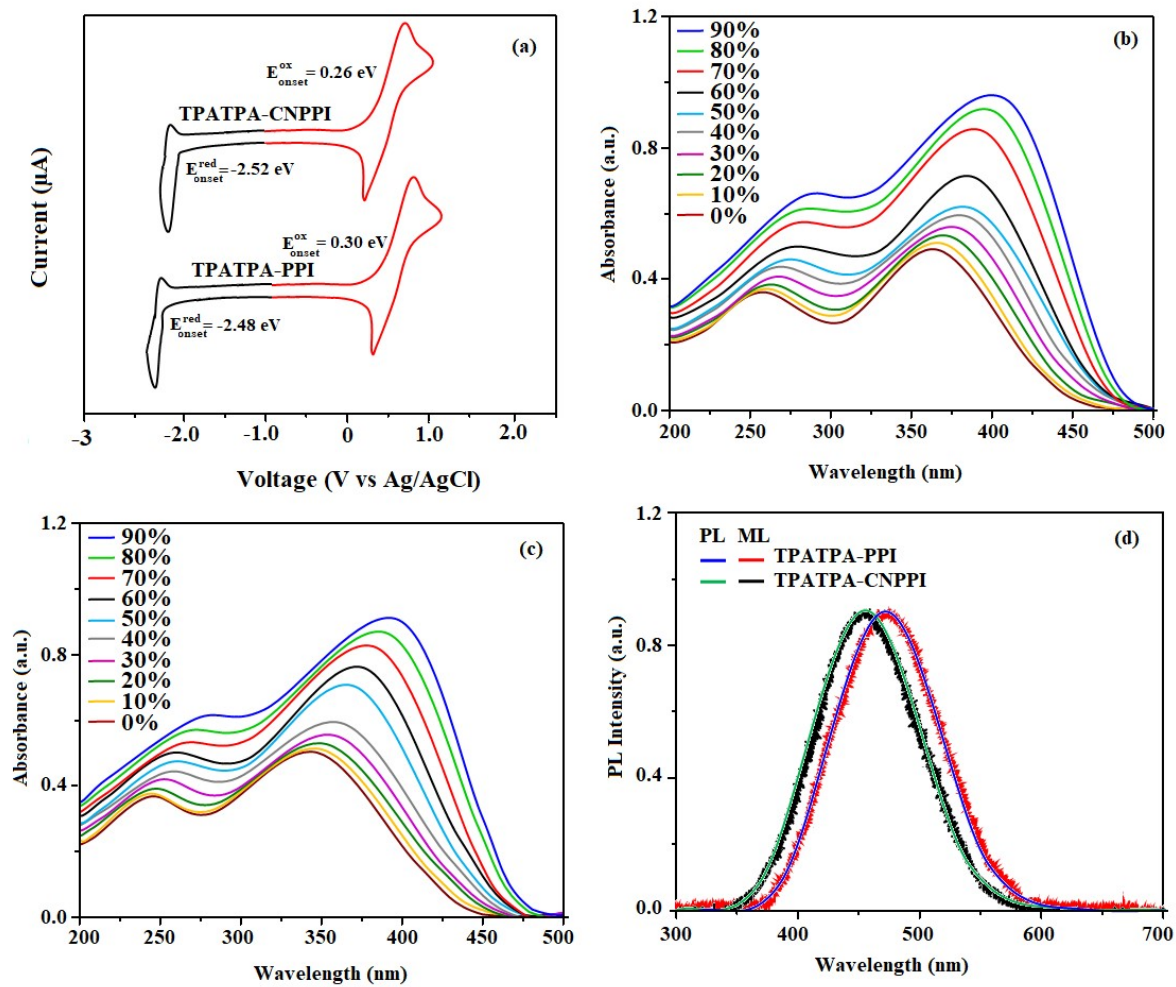

**Figure S3. Optimised geometry, HOMO-LUMO orbitals, net dipole moment of couples and intermolecular interactions of couples I-III of TPATPA-PPI.**

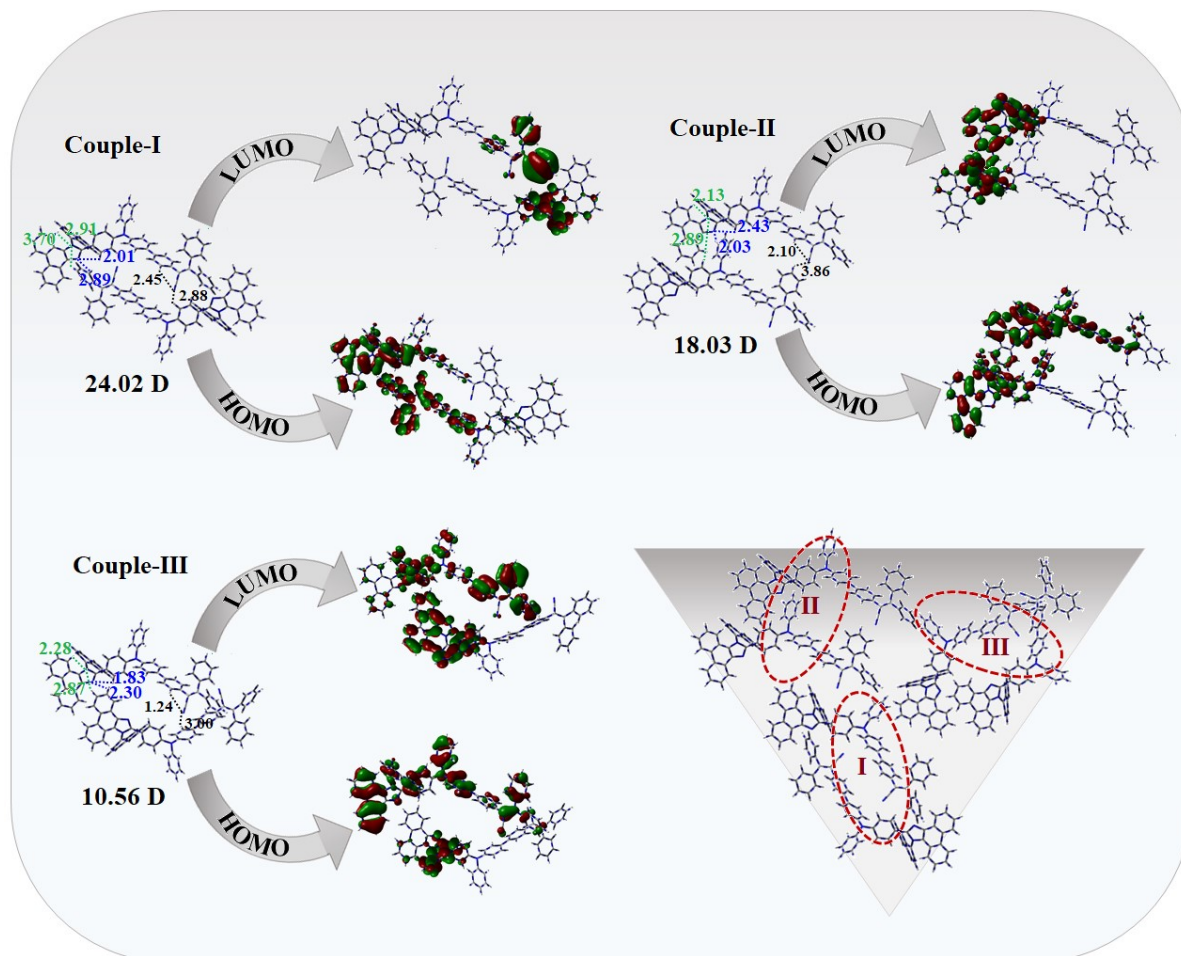

#### SI-IV. (a) Solvatochromism for HLCT character

The optical characteristics of emissive materials were studied in solution as well as solid by absorption and emission studies. When cyano group is incorporated, the modification in charge-transfer state red-shifted the absorption and emission. The CN group influences the electronic properties as well as band-gap. It is in accordance with quantum chemical calculations. The emission peak was red shifted as increasing the solvent polarity because of polarization induced optical shift (Tables S3 and S4: Figure S4). The PL spectra gradually widened indicates that their excited state have strong CT character when compared to ground state and further stabilized by polar solvents.

**Figure S4. Solvatochromism: (a) Normalised absorption spectra and (b) Normalised emission spectra of TPATPA-PPI and TPATPA-CNPII.**

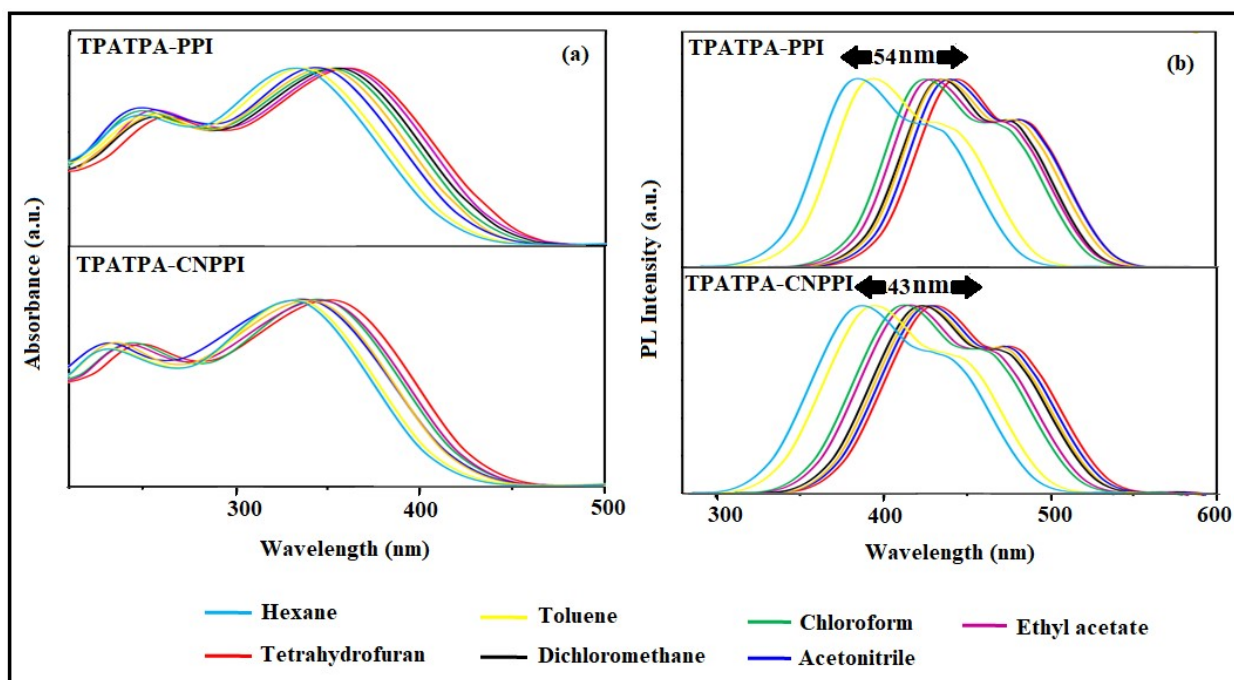

#### (b) Transition density matrix (TDM) plot

The existence of LE and CT states can be discussed from wave function of electron-hole pairs transition density matrix (TDM) plot. The diagonal region represents LE component and off-diagonal region shows CT component. Upon excitation, electron transferred from donor and localized on acceptor: depending upon intramolecular geometrical and electronic

coupling, transferred electron delocalized from the region of nearby donor to the vicinity of acceptor. This effect can be qualitatively studied by analysing electron density distribution at ground and excited states. Computed electron-hole properties, distance between hole and electron, transition density, H and t indexes and RMSD of electron and hole of these emitters are displayed in Tables S10-S12.

**Figure S5. Contour plot of transition density matrices (TDM) with hole and particle distribution [green - increasing electron density and blue- decreasing electron density] of TPATPA-PPI.**

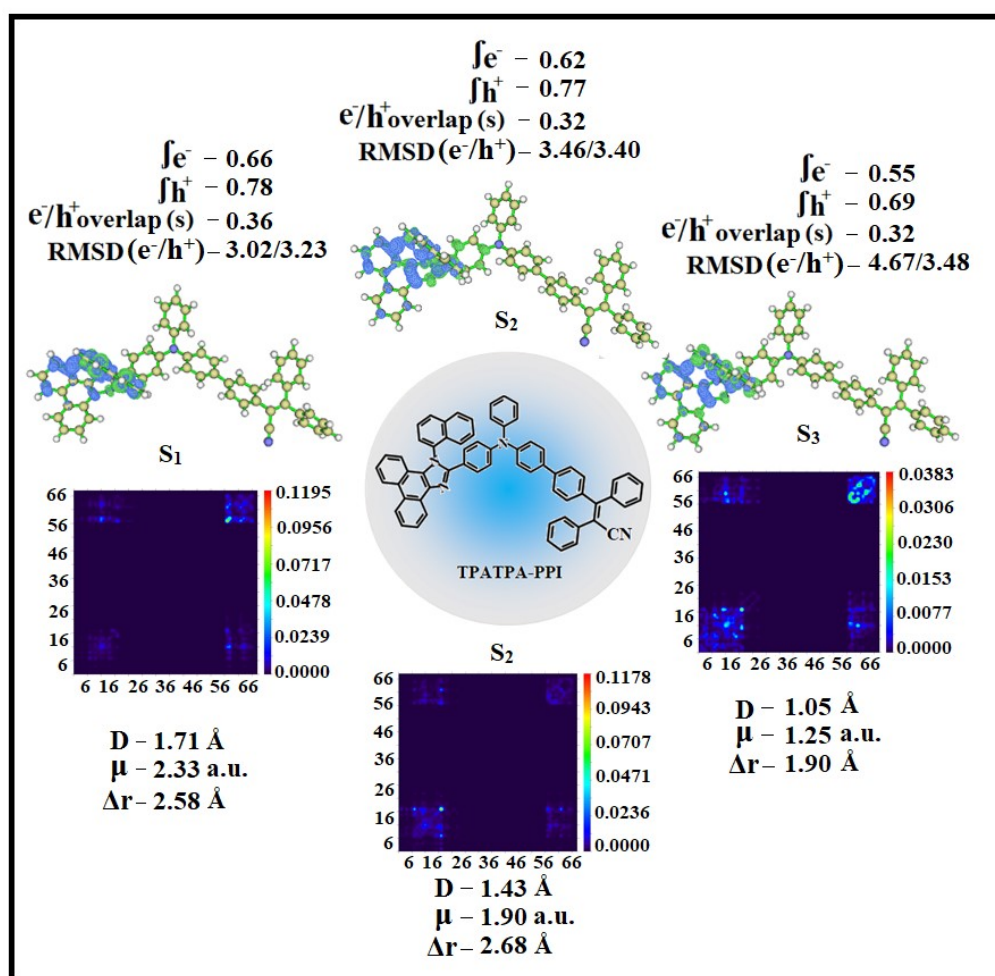

The integral value of hole and electron with transition density have been shown in Tables S5-S9. The integral overlap of hole-electron distribution (S) is a measure of spatial separation of hole and electron. The integral overlap (S) of hole and electron and distance (D) between centroids of hole and electron proved the existence of LE and CT states. These emitters



show small S and high D, indicates higher charge transfer (CT) variation of dipole moment with respect to  $S_0$  state. These values are directly evaluated based on the position of centroid of hole and electron. RMSD of hole or electron characterizes their distribution breadth: RMSD of both electron and hole is higher in X direction indicates electron and hole distribution is much broader in Y and Z directions (Tables S5-S8). The overlap between the region of density depletion and increment have been visualised by using two centroids of charges (equations S9 and S10). The H and t indexes for TPATPA-PPI and TPATPA-CNPPI are tabulated (Tables S7 and S8). The CT index, *i.e.* index difference between  $D_{CT}$  and H index is another measure of the separation of hole-electron (equations S15 and S16). The  $D_{CT}$  of TPATPA-PPI and TPATPA-CNPPI has been calculated to be 8.585 and 0.296, respectively and the calculated.  $H/t$  indexes are of TPATPA-PPI (6.939/2.111), TPATPA-CNPPI (7.386/7.177) (Figure S7 and Table S9). For TPATPA-PPI and TPATPA-CNPPI, the non-zero  $t$  is negative in all directions: overlap of hole and electron is very severe and eign value is greater than 0.96, supports the hybridization and described in terms of dominant excitation pair in terms of 94 % of transition.

The hybridization of these materials have been further evidenced by  $\Delta r$  index (Tables S1 and S2). The  $\Delta r$  index (equation S1) is average of hole ( $h^+$ )-electron ( $e^-$ ) distance ( $d_{h^+ \cdot e^-}$ ) upon excitation which indicates the nature of excitation type, LE or CT: valence excitation (LE) is related to short distances ( $d_{h^+ \cdot e^-}$ ) while larger distances ( $d_{h^+ \cdot e^-}$ ) related to CT excitation. The triplet exciton is transformed to singlet exciton *via* RISC process with high energy excited state (hot CT channel) which are beneficial for triplet exciton conversion in electroluminescence process without delayed fluorescence [10, 11]. The CT excitons have been formed with weak binding energy ( $E_b$ ) on higher excited states [12, 13]. As a result, the exciton utilization can be harvested in TPATPA-PPI and TPATPA-CNPPI like phosphorescent

materials. The hybridization between LE and CT components leads to high EUE and enhanced OLEDs performances (Table 2) [13].

**Figure S6. Contour plot of transition density matrices (TDM) with hole and particle distribution [green - increasing electron density and blue- decreasing electron density] of TPATPA-CNPPI.**

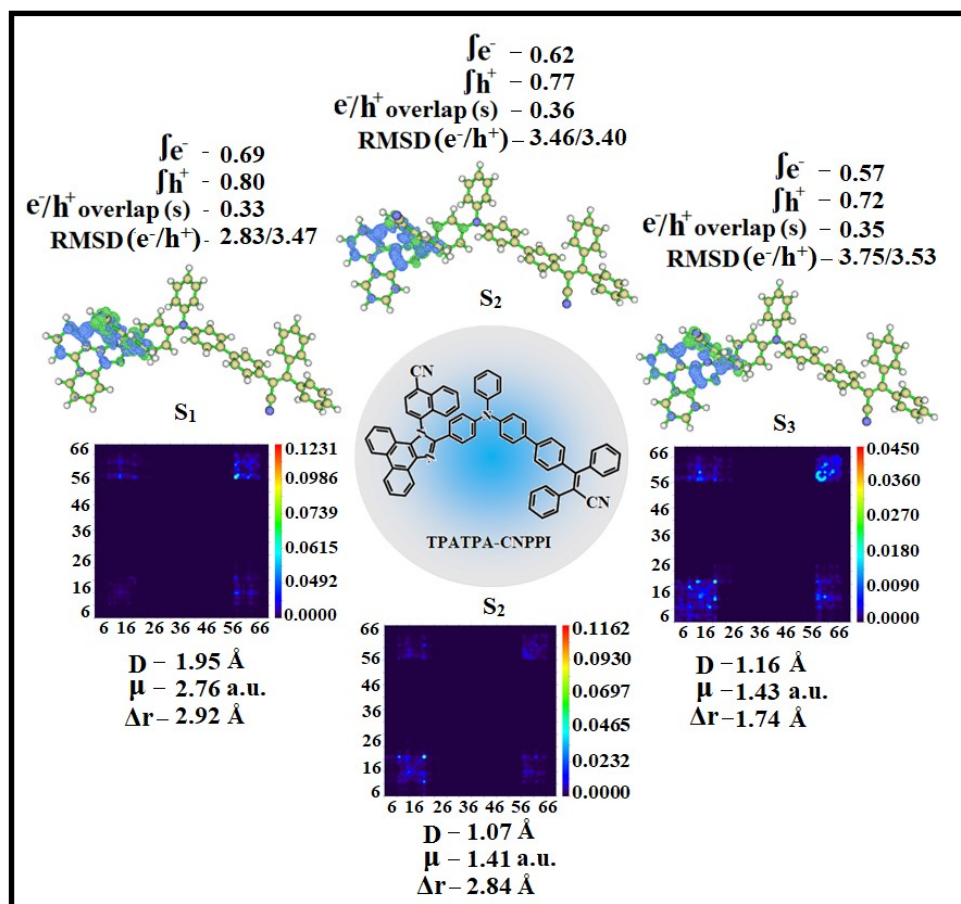

**Figure S7. Graphical representation of  $D_{CT}$  and centroid of charges [ $C^+(r) / C^-(r)$ ; isosurface (0.1 a.u)].**

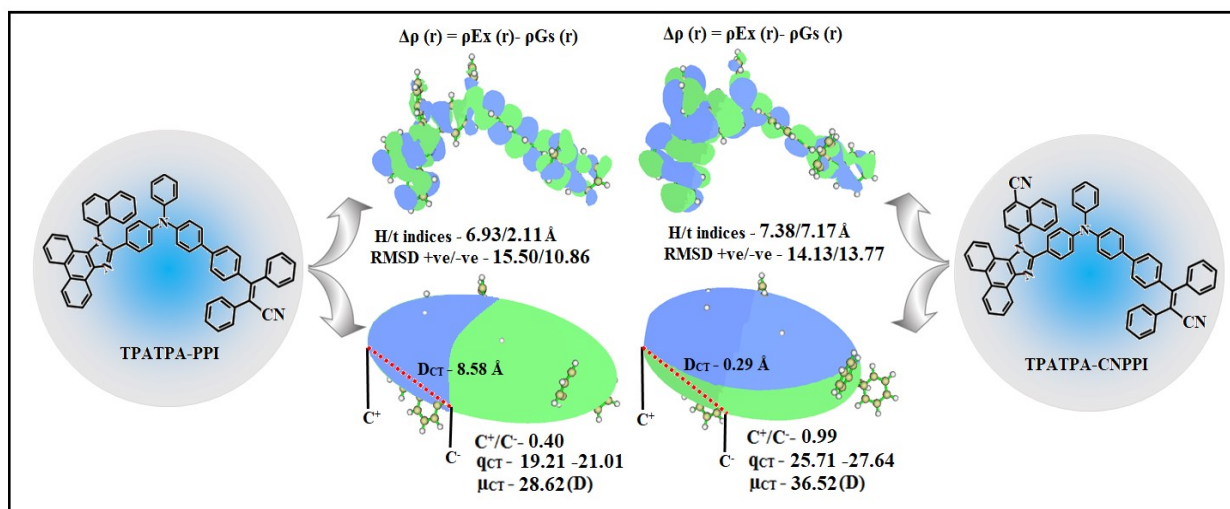

### (c) Potential energy scan (PES)

The potential energy surface (PES) scan have been plotted as a function of twist angle between C2 substituent and phenanthroimidazole core in gas phase and different polar solvents (Figures S8). In gas phase, it is impossible for S3 mixing with S1 state as a result of large energy gap between them. An increasing solvent polarity, the large dipole moment of S3 state leads to energetic stabilization. In low polarity solvent (hexane), S3 state can intercross with S1 state whereas in high polarity solvent (acetonitrile), S3 state energy decreases sharply and becomes lowest excited state. In moderate polar solvents (chloroform), the energetic closeness results in an enhanced mixing of S3 with S1. Therefore, S1 state is dominated by LE character in low polar medium; S1 state is dominated by mixing LE and CT character in moderate polar medium and S1 state is dominated by CT character in high polar medium.

**Figure S8. Potential energy scan (PES) and different polar solvents of (a) TPATPA-PPI and (b) TPATPA-CNPPI.**

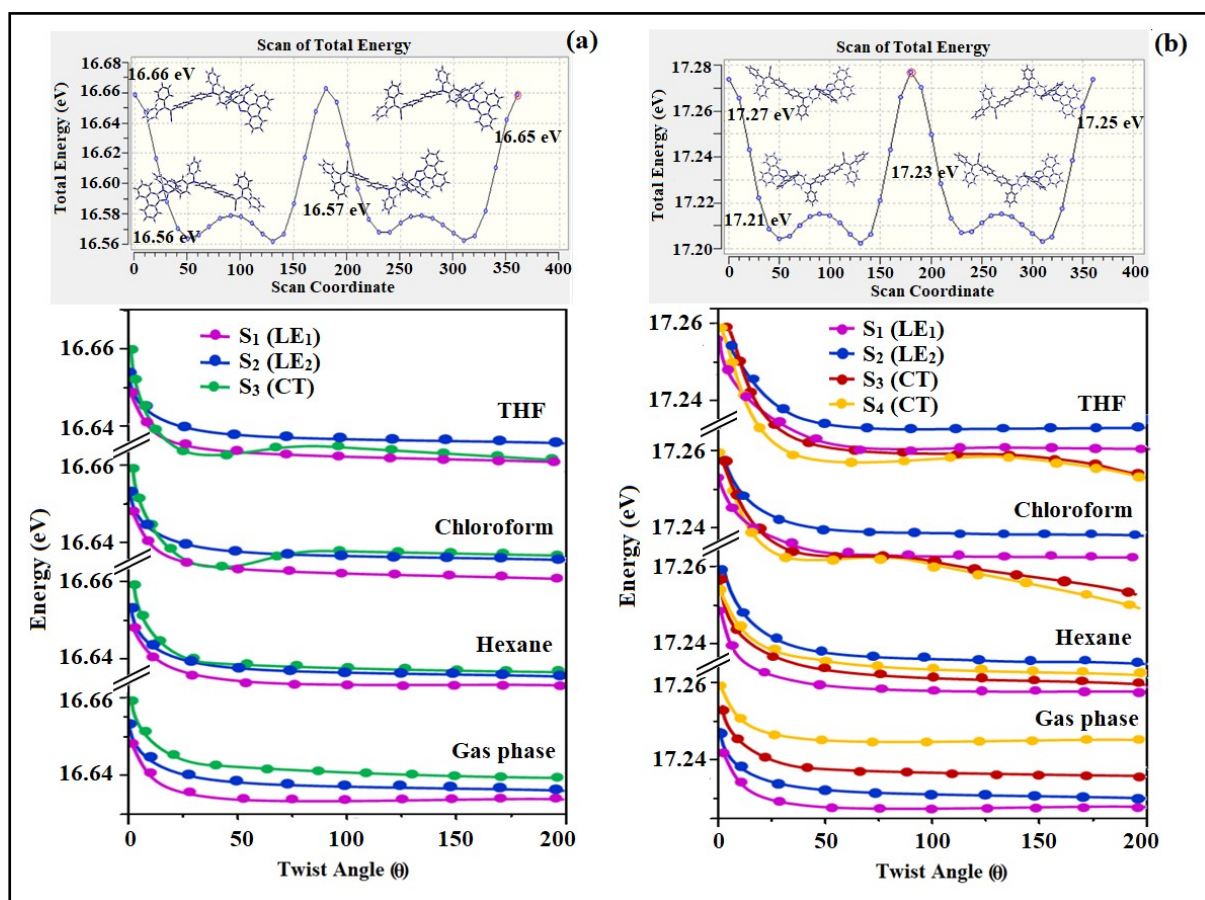

#### (d) Hot exciton mechanism

The interstate hybridization coupling between LE and CT state wave function are of  $\Psi_{S_1/S_2} = c_{LE} \cdot \Psi_{LE} \pm c_{CT} \cdot \Psi_{CT}$ . The % CT of these emitters increases as increasing the aromatic fragment size and also partially influenced by steric hindrance. The % LE in S1 state, these emitter's exhibit higher photoluminance efficiency ( $\eta_{PL}$ ) and high lying CT state increased the EUE (Figure S9). Therefore, degree of hybridization between LE and CT states depends not only initial  $E_{LE}-E_{CT}$  energy gap but also their interstate coupling strength [14]. Especially, the large energy differences of the initial LE and CT states in TPATPA-PPI lead to non-equivalent hybridization between LE and CT states, whereas the isoenergetic LE and CT states of TPATPA-CNPPi belongs to quasi-equivalent hybridization. The vertical excitation energies for the pure LE state were obtained for the corresponding conjugated molecular backbone by replacing the cyano group with hydrogen atoms and the vertical excitation energy of pure CT state were roughly estimated according to the energy conservation ( $E_{S_1} + E_{S_2} = E_{LE} + E_{CT}$ ).

**Figure S9. Reverse intersystem crossing.**

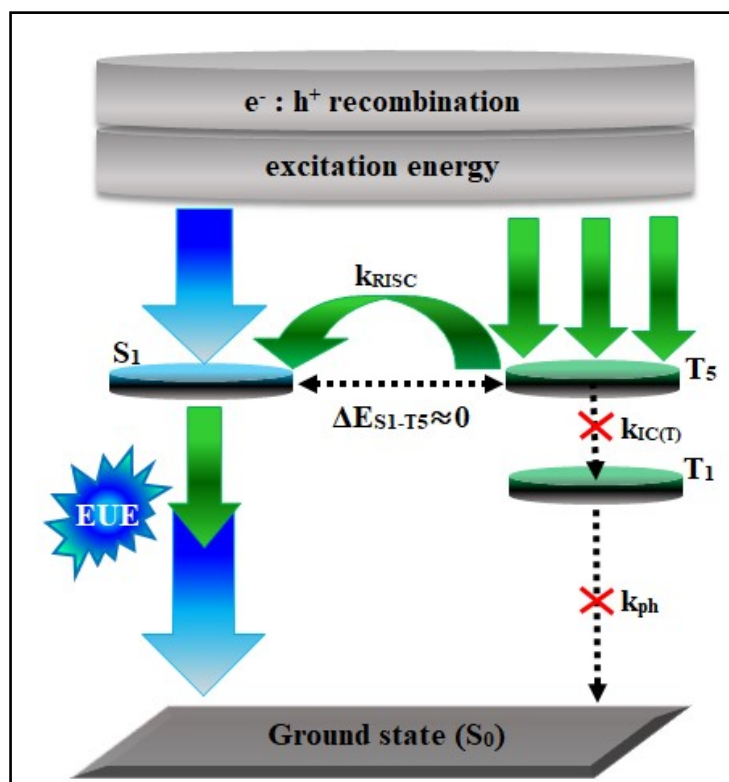

In hot exciton mechanism, the core concept is increasing the rate of  $h_{RISC}$  ( $k_{hRISC}$ ) from  $T_n$  ( $n \geq 2$ ) to  $S_m$  ( $m \geq 1$ ), while decreasing the rate of internal conversion ( $k_{IC}$ ) from  $T_n$  ( $n \geq 2$ ) to  $T_1$ . When  $k_{hRISC} \gg k_{IC}$ , the non-radiative triplet excitons could be fully converted into radiative singlet excitons, resulting in improvement of device efficiency. According to Fermi's golden rule [9],  $k_{hRISC}$  depends on  $\Delta E_{ST}$  and spin-orbit coupling (SOC), as expressed in formula S17

$$k_{hRISC} \propto \left| \frac{\langle \Psi_{S_m} | \hat{H}_{SO} | \Psi_{T_n} \rangle}{\Delta E_{S_m T_n}} \right|^2 \quad (m \geq 1, n \geq 2) \dots \dots \dots S17$$

in which  $\Psi_{T_n}$  and  $\Psi_{S_m}$  represent the wave functions of initial ( $T_n$ ,  $n \geq 2$ ) and final ( $S_m$ ,  $m \geq 1$ ) states of  $h_{RISC}$ , respectively,  $\hat{H}_{SO}$  is the operator for SOC  $\langle \Psi_{S_m} | \hat{H}_{SO} | \Psi_{T_n} \rangle$  and represent the SOC matrix element and the energy difference between  $T_n$  and  $S_m$ ,  $\Delta E_{S_m T_n}$ . Therefore, increasing  $k_{hRISC}$  from  $T_n$  to  $S_m$  requires small  $\Delta E_{S_m T_n}$  and large SOC. On the other hand,  $k_{IC}$  can be expressed by using the following formula S18 [10]

$$k_{IC} \propto \left| \frac{\langle \Psi_{T_n} | \hat{T}_N | \Psi_{T_1} \rangle}{\Delta E_{T_n T_1}} \right|^2 \quad (n \geq 2) \dots \dots \dots S18$$

where,  $\Psi_{T_n}$  and  $\Psi_{T_1}$  represent the wave functions of high-lying ( $T_n$ ,  $n \geq 2$ ) and low-lying triplet states of IC process, respectively,  $\Psi_{T_n} \langle \hat{T}_N | \Psi_{T_1} \rangle \Delta E_{T_n T_1}$  is the electronic operator describing the coupling energy gap between  $T_n$  and  $T_1$  states. In consequence, decreasing  $k_{IC}$  from  $T_n$  to  $T_1$  requires poor electronic coupling factor and large  $\Delta E_{T_n T_1}$ . Usually, a large energy gap between the initial and final state plays a critical role in the slow  $k_{IC}$ . So, three

positive factors including large  $\Delta E_{T_n T_1}$ , small  $\Delta E_{S_m T_1}$  and large  $\langle \Psi_{S_m} | \hat{T}_{S_0} | \Psi_{T_n} \rangle$  are liable to achieve efficient OLEDs with “hot exciton” mechanism.

### SI-V. Performances of single carrier devices

**Figure S10. (a) Current density-voltage (J-V) characteristics of single carrier devices; (b) Luminescence-current density plot and (c) Schematic representation of HLCT-SF OLEDs.**

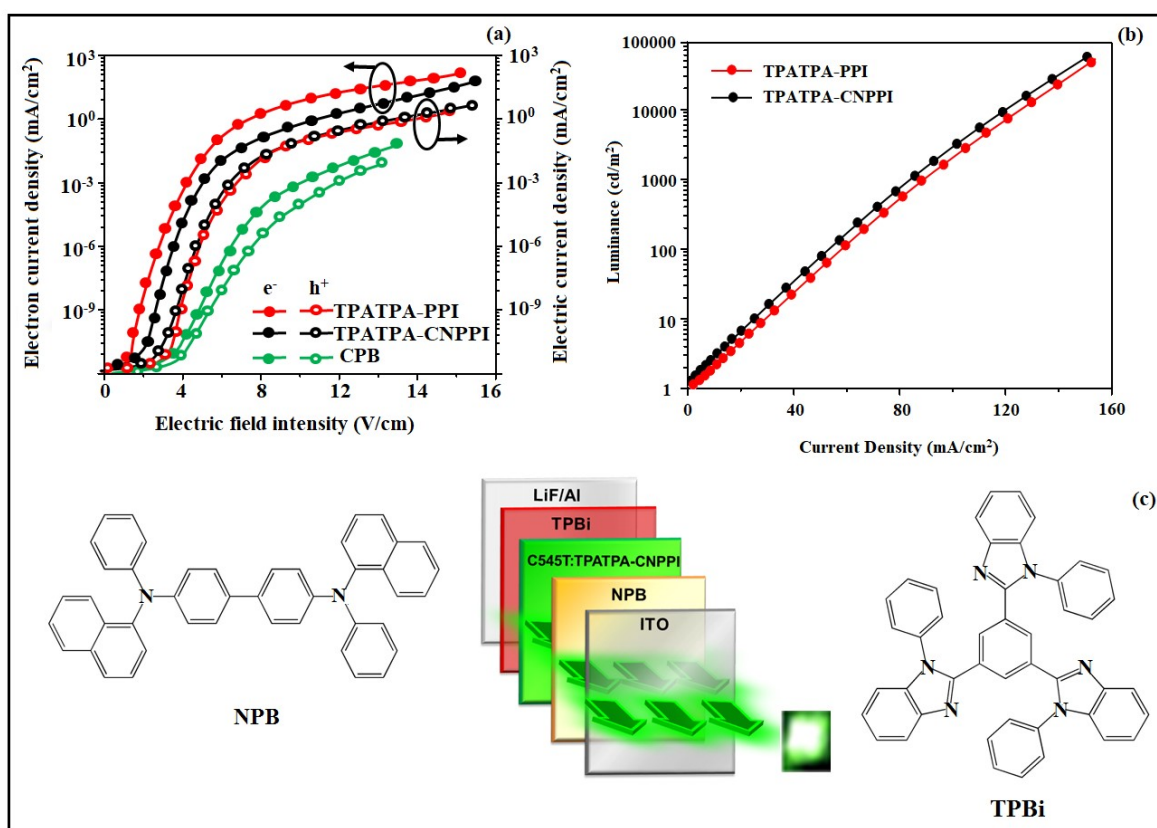

## SI-VI. Tables

**Table S1. Computed singlet ( $E_S$ ) and triplet ( $E_T$ ) energies (eV), oscillator strength ( $f$ ) and dipole moment ( $\mu$ , D) of TPATPA-PPI from NTOs.**

| Energy level | $E_S$ | Oscillator strength ( $f$ ) | $\Delta r$ index | NTO Transitions                        | $E_T$ | NTO Transitions                        | $\mu$ (D) |
|--------------|-------|-----------------------------|------------------|----------------------------------------|-------|----------------------------------------|-----------|
| 1            | 3.12  | 0.6780                      | 2.58             | <sup>74%</sup><br>169 $\rightarrow$ 17 | 1.45  | <sup>40%</sup><br>166 $\rightarrow$ 17 | 2.33      |
|              |       |                             |                  | 2                                      |       | 0                                      |           |
| 2            | 3.19  | 0.4330                      | 2.68             | <sup>44%</sup><br>166 $\rightarrow$ 17 | 1.98  | <sup>21%</sup><br>169 $\rightarrow$ 18 | 1.90      |
|              |       |                             |                  | 0                                      |       | 3                                      |           |
| 3            | 3.30  | 0.0480                      | 1.90             | <sup>19%</sup><br>168 $\rightarrow$ 17 | 2.39  | <sup>28%</sup><br>165 $\rightarrow$ 17 | 1.25      |
|              |       |                             |                  | 0                                      |       | 2                                      |           |
| 4            | 3.41  | 0.0084                      | 2.53             | <sup>19%</sup><br>169 $\rightarrow$ 17 | 3.01  | <sup>28%</sup><br>165 $\rightarrow$ 17 | 1.30      |
|              |       |                             |                  | 6                                      |       | 2                                      |           |
| 5            | 3.42  | 0.5333                      | 3.28             | <sup>54%</sup><br>168 $\rightarrow$ 17 | 3.12  | <sup>25%</sup><br>168 $\rightarrow$ 17 | 1.86      |
|              |       |                             |                  | 1                                      |       | 1                                      |           |
| 6            | 3.51  | 0.0695                      | 3.41             | <sup>21%</sup><br>166 $\rightarrow$ 17 | 3.15  | <sup>25%</sup><br>168 $\rightarrow$ 17 | 1.94      |
|              |       |                             |                  | 0                                      |       | 1                                      |           |
| 7            | 3.56  | 0.2755                      | 2.07             | <sup>52%</sup><br>169 $\rightarrow$ 17 | 3.19  | <sup>25%</sup><br>168 $\rightarrow$ 17 | 1.76      |



|    |      |        |      |                            |      |                            |      |
|----|------|--------|------|----------------------------|------|----------------------------|------|
|    |      |        |      | 8                          |      | 1                          |      |
| 8  | 3.59 | 0.0582 | 3.18 | <sup>18%</sup><br>169 → 18 | 3.20 | <sup>25%</sup><br>168 → 17 | 2.59 |
|    |      |        |      | 3                          |      | 1                          |      |
| 9  | 3.60 | 0.0594 | 2.15 | <sup>38%</sup><br>168 → 17 | 3.22 | <sup>25%</sup><br>162 → 18 | 1.61 |
|    |      |        |      | 3                          |      | 1                          |      |
| 10 | 3.74 | 0.5152 | 2.91 | <sup>26%</sup><br>165 → 17 | 3.26 | <sup>25%</sup><br>162 → 18 | 2.62 |
|    |      |        |      | 2                          |      | 1                          |      |

---

**Table S2. Computed singlet ( $E_S$ ) and triplet ( $E_T$ ) energies (eV), oscillator strength ( $f$ ) and dipole moment ( $\mu$ , D) of TPATPA-CNPPI from NTOs.**

| Energy level | $E_S$ | Oscillator strength ( $f$ ) | $\Delta r$ index | NTO Transitions                         | $E_T$ | NTO Transitions                         | $\mu$ (D) |
|--------------|-------|-----------------------------|------------------|-----------------------------------------|-------|-----------------------------------------|-----------|
| 1            | 3.34  | 0.2893                      | 2.92             | <sup>60%</sup><br>169 $\rightarrow$ 174 | 1.13  | <sup>61%</sup><br>169 $\rightarrow$ 174 | 2.76      |
| 2            | 3.38  | 0.4542                      | 2.84             | <sup>69%</sup><br>173 $\rightarrow$ 176 | 1.98  | <sup>22%</sup><br>173 $\rightarrow$ 188 | 1.41      |
| 3            | 3.41  | 0.0498                      | 1.74             | <sup>20%</sup><br>171 $\rightarrow$ 176 | 2.39  | <sup>30%</sup><br>170 $\rightarrow$ 176 | 1.43      |
| 4            | 3.43  | 0.5159                      | 3.13             | <sup>61%</sup><br>172 $\rightarrow$ 175 | 3.01  | <sup>19%</sup><br>171 $\rightarrow$ 183 | 2.85      |
| 5            | 3.52  | 0.0070                      | 3.39             | <sup>23%</sup><br>173 $\rightarrow$ 181 | 3.34  | <sup>32%</sup><br>172 $\rightarrow$ 175 | 1.24      |
| 6            | 3.55  | 0.0851                      | 2.36             | <sup>22%</sup><br>169 $\rightarrow$ 177 | 3.36  | <sup>32%</sup><br>172 $\rightarrow$ 175 | 1.94      |
| 7            | 3.56  | 0.2708                      | 2.80             | <sup>54%</sup><br>173 $\rightarrow$ 183 | 3.39  | <sup>29%</sup><br>165 $\rightarrow$ 174 | 1.07      |
| 8            | 3.57  | 0.0861                      | 1.62             | <sup>19%</sup><br>172 $\rightarrow$ 177 | 3.41  | <sup>29%</sup><br>165 $\rightarrow$ 174 | 1.15      |
| 9            | 3.59  | 0.0628                      | 2.94             | <sup>26%</sup><br>171 $\rightarrow$ 176 | 3.42  | <sup>28%</sup><br>166 $\rightarrow$ 186 | 2.01      |
| 10           | 3.94  | 0.5093                      | 1.85             | <sup>26%</sup><br>170 $\rightarrow$ 176 | 3.43  | <sup>28%</sup><br>166 $\rightarrow$ 186 | 1.04      |

**Table S3. Photophysical properties of TPATPA-PPI in different solvents.**

| <b>Solvents</b> | <b><math>\epsilon</math></b> | <b>n</b> | <b>f<br/>(<math>\epsilon, n</math>)</b> | <b><math>\lambda_{ab}</math><br/>(nm)</b> | <b><math>\nu_{ab}</math><br/>(<math>\text{cm}^{-1}</math>)</b> | <b><math>\lambda_{flu}</math><br/>(nm)</b> | <b><math>\nu_{flu}</math><br/>(<math>\text{cm}^{-1}</math>)</b> | <b><math>\nu_{ss}</math><br/>(<math>\text{cm}^{-1}</math>)</b> |
|-----------------|------------------------------|----------|-----------------------------------------|-------------------------------------------|----------------------------------------------------------------|--------------------------------------------|-----------------------------------------------------------------|----------------------------------------------------------------|
| Hexane          | 1.88                         | 1.37     | 0.0004                                  | 336                                       | 29762                                                          | 389                                        | 25707                                                           | 4055                                                           |
| Toluene         | 2.38                         | 1.49     | 0.014                                   | 337                                       | 29674                                                          | 393                                        | 25445                                                           | 4228                                                           |
| Chloroform      | 4.81                         | 1.44     | 0.148                                   | 358                                       | 27933                                                          | 429                                        | 23310                                                           | 4623                                                           |
| ethyl acetate   | 6.09                         | 1.41     | 0.186                                   | 361                                       | 27701                                                          | 437                                        | 22883                                                           | 4818                                                           |
| THF             | 7.52                         | 1.40     | 0.209                                   | 362                                       | 27624                                                          | 443                                        | 22573                                                           | 5051                                                           |
| DCM             | 9.08                         | 1.42     | 0.218                                   | 359                                       | 27855                                                          | 442                                        | 22624                                                           | 5231                                                           |
| DMF             | 36.7                         | 1.42     | 0.276                                   | 353                                       | 28329                                                          | 441                                        | 22676                                                           | 5653                                                           |
| acetonitrile    | 37.5                         | 1.34     | 0.305                                   | 346                                       | 28902                                                          | 442                                        | 22624                                                           | 6277                                                           |

**Table S4. Photophysical properties of TPATPA-CNPI in different solvents.**

| <b>Solvents</b> | <b><math>\epsilon</math></b> | <b>n</b> | <b>f<br/>(<math>\epsilon, n</math>)</b> | <b><math>\lambda_{ab}</math><br/>(nm)</b> | <b><math>\nu_{ab}</math><br/>(<math>\text{cm}^{-1}</math>)</b> | <b><math>\lambda_{flu}</math><br/>(nm)</b> | <b><math>\nu_{flu}</math><br/>(<math>\text{cm}^{-1}</math>)</b> | <b><math>\nu_{ss}</math><br/>(<math>\text{cm}^{-1}</math>)</b> |
|-----------------|------------------------------|----------|-----------------------------------------|-------------------------------------------|----------------------------------------------------------------|--------------------------------------------|-----------------------------------------------------------------|----------------------------------------------------------------|
| Hexane          | 1.88                         | 1.37     | 0.0004                                  | 330                                       | 30303                                                          | 387                                        | 25840                                                           | 4463                                                           |
| Toluene         | 2.38                         | 1.49     | 0.014                                   | 332                                       | 30120                                                          | 394                                        | 25381                                                           | 4740                                                           |
| Chloroform      | 4.81                         | 1.44     | 0.148                                   | 346                                       | 28901                                                          | 419                                        | 23866                                                           | 5035                                                           |
| ethyl acetate   | 6.09                         | 1.41     | 0.186                                   | 346                                       | 28902                                                          | 421                                        | 23753                                                           | 5149                                                           |
| THF             | 7.52                         | 1.40     | 0.209                                   | 351                                       | 28490                                                          | 430                                        | 23256                                                           | 5234                                                           |
| DCM             | 9.08                         | 1.42     | 0.218                                   | 346                                       | 28901                                                          | 427                                        | 23419                                                           | 5483                                                           |
| DMF             | 36.7                         | 1.42     | 0.276                                   | 341                                       | 29326                                                          | 428                                        | 23364                                                           | 5961                                                           |
| acetonitrile    | 37.5                         | 1.34     | 0.305                                   | 336                                       | 29762                                                          | 429                                        | 23310                                                           | 6452                                                           |

**Table S5. Computed hole and electron overlap (S), distance between centroids of hole and electron (D, Å) and dipole moment ( $\mu$ ) for singlet states of TPATPA-PPI.**

| State | Hole integral | Electron integral | Integral of transition density | Integral overlap of $h^+ - e^-$ (S) | Centroid of hole (Å) |         |         | Centroid of electron (Å) |         |         | D (Å) | $\mu$ (a.u) |
|-------|---------------|-------------------|--------------------------------|-------------------------------------|----------------------|---------|---------|--------------------------|---------|---------|-------|-------------|
|       |               |                   |                                |                                     | x                    | y       | z       | x                        | y       | z       |       |             |
| S1    | 0.7763        | 0.6682            | 0.3663                         | 0.3663                              | -7.0128              | -0.0280 | 1.1310  | -5.6180                  | 0.0655  | 2.1185  | 1.71  | 2.33        |
| S2    | 0.7753        | 0.6266            | -0.0121                        | 0.3220                              | -7.3388              | -0.5186 | 0.4509  | -5.9812                  | -0.2725 | 0.0507  | 1.43  | 1.90        |
| S3    | 0.6965        | 0.5595            | -0.0058                        | 0.3002                              | -7.0070              | -0.4392 | 0.4716  | -6.0599                  | -0.3951 | 0.9373  | 1.05  | 1.25        |
| S4    | 0.8147        | 0.6253            | 0.0016                         | 0.3726                              | -4.3144              | 0.2831  | 0.3102  | -5.2255                  | -0.0014 | 0.2440  | 0.95  | 1.30        |
| S5    | 0.6577        | 0.5164            | -0.0054                        | 0.3159                              | -5.1872              | 0.1561  | 0.2300  | -5.3960                  | -0.0670 | 0.9467  | 0.77  | 0.86        |
| T1    | 0.6308        | 0.5289            | -0.0072                        | 0.3823                              | -6.0845              | 0.1402  | 1.7052  | -5.6049                  | 0.0580  | 2.0217  | 0.58  | 0.63        |
| T2    | 0.5569        | 0.4207            | 0.0023                         | 0.2817                              | -5.6907              | -0.4720 | -0.1919 | -5.3891                  | -0.0646 | -0.2641 | 0.51  | 0.47        |
| T3    | 0.4310        | 0.3190            | 0.0004                         | 0.2151                              | -4.9703              | -0.2319 | 0.0257  | -5.0529                  | -0.0408 | -0.4545 | 0.52  | 0.37        |
| T4    | 0.5884        | 0.4500            | 0.0022                         | 0.3295                              | 7.6823               | -0.8842 | 0.1750  | 8.3174                   | -0.7977 | 0.1111  | 0.64  | 0.63        |
| T5    | 0.4935        | 0.3805            | 0.0128                         | 0.2405                              | -7.3059              | -0.9161 | -0.2202 | -6.5374                  | -0.7128 | 0.2641  | 0.93  | 0.76        |

**Table S6. Computed hole and electron overlap (S), distance between centroids of hole and electron (D, Å) and dipole moment ( $\mu$ ) for singlet states of TPATPA-CNPPI.**

| State | Hole integral | Electron integral | Integral of transition density | Integral overlap of $h^+ - e^-$ (S) | Centroid of hole (Å) |         |         | Centroid of electron (Å) |         |         | D (Å) | $\mu$ (a.u) |
|-------|---------------|-------------------|--------------------------------|-------------------------------------|----------------------|---------|---------|--------------------------|---------|---------|-------|-------------|
|       |               |                   |                                |                                     | x                    | y       | z       | x                        | y       | z       |       |             |
| S1    | 0.8036        | 0.6965            | -0.0072                        | 0.3366                              | -6.7279              | -0.1136 | 0.7185  | -5.6223                  | 0.2910  | 2.2773  | 1.95  | 2.76        |
| S2    | 0.7747        | 0.6226            | -0.0100                        | 0.3697                              | -6.9832              | -0.5667 | 0.1526  | -5.9424                  | -0.3077 | 0.0928  | 1.07  | 1.41        |
| S3    | 0.7210        | 0.5785            | -0.0075                        | 0.3558                              | -6.8377              | -0.6075 | 0.0495  | -6.3903                  | -0.2530 | 1.0705  | 1.16  | 1.43        |
| S4    | 0.8025        | 0.6372            | -0.0000                        | 0.2908                              | -3.7352              | 0.5577  | -0.0734 | -5.3759                  | 0.0903  | 1.1482  | 2.09  | 2.85        |
| S5    | 0.7094        | 0.5599            | -0.0057                        | 0.3273                              | -4.7952              | 0.1469  | -0.0208 | -5.1802                  | 0.0816  | 0.9439  | 1.04  | 1.24        |
| T1    | 0.6614        | 0.5537            | -0.0052                        | 0.3912                              | -5.5678              | 0.1762  | 1.5464  | -5.6126                  | 0.2573  | 2.1025  | 0.56  | 0.64        |
| T2    | 0.5648        | 0.4328            | -0.0025                        | 0.2770                              | -7.1792              | -1.2476 | -0.7367 | -5.9410                  | -0.5426 | -0.4958 | 1.44  | 1.36        |
| T3    | 0.4205        | 0.3070            | 0.0091                         | 0.2023                              | -3.1191              | 0.3114  | -0.1874 | -3.6461                  | 0.4152  | -0.6966 | 0.74  | 0.50        |
| T4    | 0.6193        | 0.4683            | -0.0017                        | 0.3452                              | 7.6988               | -1.0051 | 0.1142  | 8.1397                   | -0.8233 | 0.1241  | 0.47  | 0.49        |
| T5    | 0.5022        | 0.3909            | -0.0098                        | 0.2648                              | -6.7837              | -0.8288 | -0.3282 | -6.4099                  | -0.8548 | -0.1025 | 0.43  | 0.36        |

**Table S7. Computed RMSD of electron and hole, H index and t index for singlet states of TPATPA-PPI.**

| State | RMSD (Electron) |       |       |       | RMSD (Hole) |       |       |       | H index |       |       | t index |        |        |        |       |
|-------|-----------------|-------|-------|-------|-------------|-------|-------|-------|---------|-------|-------|---------|--------|--------|--------|-------|
|       | x               | y     | z     | total | x           | y     | z     | total | x       | y     | z     | Total   | x      | y      | z      | Total |
| S1    | 2.113           | 1.178 | 1.818 | 3.026 | 2.434       | 1.347 | 1.657 | 3.238 | 2.274   | 1.262 | 1.737 | 3.128   | -0.879 | -1.169 | -0.750 | 1.643 |
| S2    | 2.704           | 1.386 | 1.670 | 3.467 | 2.485       | 1.597 | 1.686 | 3.401 | 2.594   | 1.492 | 1.678 | 3.431   | -1.237 | -1.246 | -1.277 | 2.171 |
| S3    | 3.731           | 1.880 | 2.090 | 4.671 | 2.567       | 1.586 | 1.740 | 3.483 | 3.149   | 1.733 | 1.915 | 4.073   | -2.202 | -1.689 | -1.449 | 3.131 |
| S4    | 2.439           | 1.285 | 1.863 | 3.327 | 2.910       | 1.529 | 1.950 | 3.822 | 2.675   | 1.407 | 1.906 | 3.573   | -1.763 | -1.123 | -1.840 | 2.785 |
| S5    | 2.930           | 1.411 | 2.063 | 3.851 | 3.355       | 1.652 | 1.799 | 4.150 | 3.143   | 1.531 | 1.931 | 3.993   | -2.934 | -1.308 | -1.214 | 3.434 |
| T1    | 2.070           | 1.170 | 1.874 | 3.027 | 2.360       | 1.154 | 1.699 | 3.128 | 2.215   | 1.162 | 1.786 | 3.074   | -1.735 | -1.080 | -1.470 | 2.517 |
| T2    | 3.097           | 1.497 | 1.436 | 3.728 | 3.284       | 1.771 | 1.618 | 4.067 | 3.191   | 1.634 | 1.527 | 3.897   | -2.889 | -1.227 | -1.455 | 3.460 |
| T3    | 3.251           | 1.683 | 1.337 | 3.897 | 3.838       | 1.739 | 1.806 | 3.545 | 1.711   | 1.572 | 4.238 | -3.462  | -1.520 | -1.091 | 3.935  | 4.197 |
| T4    | 2.510           | 1.879 | 0.836 | 3.245 | 3.687       | 1.905 | 0.904 | 4.248 | 3.099   | 1.892 | 0.870 | 3.733   | -2.463 | -1.806 | -0.806 | 3.159 |
| T5    | 3.299           | 1.796 | 1.939 | 4.227 | 2.741       | 1.683 | 1.546 | 3.569 | 3.020   | 1.739 | 1.743 | 3.896   | -2.251 | -1.536 | -1.258 | 3.002 |

**Table S8. Computed RMSD of electron and hole, H index and t index for singlet states of TPATPA-CNPPI.**

| State | RMSD (Electron) |       |       |       | RMSD (Hole) |       |       |       | H index |       |       | t index |        |        |        |       |
|-------|-----------------|-------|-------|-------|-------------|-------|-------|-------|---------|-------|-------|---------|--------|--------|--------|-------|
|       | x               | y     | z     | total | x           | y     | z     | total | x       | y     | z     | Total   | x      | y      | z      | Total |
| S1    | 1.850           | 1.076 | 1.864 | 2.838 | 2.646       | 1.434 | 1.745 | 3.479 | 2.248   | 1.255 | 1.805 | 3.144   | -1.142 | -0.851 | -0.246 | 1.445 |
| S2    | 3.019           | 1.427 | 1.837 | 3.811 | 2.755       | 1.645 | 1.728 | 3.644 | 2.887   | 1.536 | 1.782 | 3.724   | -1.846 | -1.277 | -1.723 | 2.830 |
| S3    | 2.547           | 1.685 | 2.179 | 3.752 | 2.561       | 1.660 | 1.783 | 3.534 | 2.554   | 1.673 | 1.981 | 3.639   | -2.106 | -1.318 | -0.960 | 2.664 |
| S4    | 2.260           | 1.208 | 2.237 | 3.402 | 2.664       | 1.351 | 1.860 | 3.519 | 2.462   | 1.280 | 2.049 | 3.449   | -0.821 | -0.812 | -0.827 | 1.421 |
| S5    | 2.637           | 1.254 | 2.215 | 3.665 | 3.485       | 1.692 | 1.827 | 4.283 | 3.061   | 1.473 | 2.021 | 3.953   | -2.676 | -1.408 | -1.056 | 3.203 |
| T1    | 1.784           | 1.080 | 1.979 | 2.875 | 2.344       | 1.205 | 1.871 | 3.232 | 2.064   | 1.143 | 1.925 | 3.045   | -2.019 | -1.062 | -1.369 | 2.660 |
| T2    | 3.270           | 1.552 | 1.499 | 3.918 | 2.540       | 0.947 | 1.691 | 1.350 | 3.337   | 2.905 | 1.622 | 3.619   | -1.667 | -0.917 | -1.184 | 2.240 |
| T3    | 3.505           | 1.684 | 1.352 | 4.117 | 3.719       | 1.593 | 1.850 | 4.449 | 3.612   | 1.639 | 1.601 | 4.277   | -3.085 | -1.535 | -1.092 | 3.615 |
| T4    | 3.058           | 1.845 | 0.889 | 3.282 | 3.103       | 3.680 | 3.548 | 1.937 | 0.918   | 4.145 | 3.303 | 3.912   | -2.862 | -1.709 | -0.894 | 3.451 |
| T5    | 2.905           | 2.072 | 2.031 | 4.106 | 3.318       | 1.722 | 1.645 | 4.084 | 3.111   | 1.897 | 1.838 | 4.242   | -2.262 | -2.492 | -1.266 | 3.596 |



**Table S9. Transferred charges ( $q_{CT}$ ), barycentres of electron density loss ( $R_+$ ) /gain ( $R_-$ ), distance between two barycenters ( $D_{CT}$ ), dipole moment of CT ( $\mu_{CT}$ ), RMSD of +ve/-ve parts, CT indices (H & t) and overlap integral of C+/C- of TPATPA-PPI and TPATPA-CNPII.**

| Emissive materials | $q_{CT}$<br>$ e^{-1} $ | $R_+$ (Å) |       |        | $R_-$ (Å) |       |       | $D_{CT}$<br>(Å) | $\mu_{CT}$<br>(D) | RMSD<br>of +ve<br>parts | RMSD<br>of -ve<br>parts | H / t<br>indices<br>(Å) | overlap<br>integral<br>of C+/ C- |
|--------------------|------------------------|-----------|-------|--------|-----------|-------|-------|-----------------|-------------------|-------------------------|-------------------------|-------------------------|----------------------------------|
|                    |                        |           |       |        |           |       |       |                 |                   |                         |                         |                         |                                  |
| TPATPA-PPI         | 19.216 -<br>21.012     | 1.930     | 1.447 | -1.592 | 10.256    | 0.685 | 0.357 | 8.585           | 28.626            | 15.501                  | 10.869                  | 6.939/2.111             | 0.4051                           |
| TPATPA-CNPII       | 25.716 -<br>27.646     | -2.220    | 0.481 | 0.039  | -2.318    | 0.202 | 0.054 | 0.296           | 36.529            | 14.137                  | 13.779                  | 7.386/7.177             | 0.9988                           |

**Table S10. Summary of device efficiencies and current state-of-the-art literature data for blue OLEDs that possess AIE-type emitters.**

| Emitter         | $V_{on}[V]$ | CE<br>(cd/A) | EQE<br>(%) | PE<br>(lm/W) | EL (nm) | Ref.      |
|-----------------|-------------|--------------|------------|--------------|---------|-----------|
| TPATPA-PPI      | 2.8         | 13.43        | 5.32       | 11.03        | 471     | This work |
| TPATPA-CNPPPI   | 2.6         | 19.58        | 8.96       | 17.82        | 457     | This work |
| NSPI-DVP        | 2.7         | 5.61         | 5.09       | 4.99         | 439     | 15        |
| CNSPI-DVP       | 2.6         | 5.03         | 5.23       | 4.72         | 427     | 15        |
| 2TriPE-BPI      | 2.8         | 4.87         | 3.74       | 5.21         | 462     | 16        |
| 2TriPE-BPI-MCN  | 3.8         | 4.72         | 4.60       | 3.17         | 452     | 16        |
| CNNPI           | 3.2         | 1.49         | 2.28       | 1.23         | 432     | 17        |
| 2TriPE-CNNPI    | 3.0         | 3.70         | 2.75       | 2.98         | 456     | 17        |
| 2CzPh-CNNPI     | 3.0         | 6.65         | 5.09       | 5.66         | 454     | 17        |
| TPE-NPPB        | 3.0         | 4.32         | 3.2        | 4.01         | 444     | 18        |
| TPE-APPB        | 3.0         | 5.28         | 5.3        | 4.92         | 428     | 18        |
| TPEPPI          | 2.9         | 4.25         | 2.36       | 3.35         | 467     | 19        |
| 3a              | 3.8         | -            | 3.9        | 9.00         | 480     | 20        |
| 3d              | 3.8         | -            | 4.0        | 9.8          | 480     | 20        |
| 3a              | -           | 11.1         | 5.6        | -            | -       | 21        |
| 3b              | -           | 9.4          | 2.3        | -            | -       | 21        |
| 3c              | -           | 9.4          | 5.0        | -            | -       | 21        |
| TPE01-PPI       | 2.7         | 3.90         | 3.75       | 4.17         | 512     | 22        |
| TPE04-PPI       | 2.7         | 4.22         | 4.07       | 4.51         | 508     | 22        |
| TPE06-PPI       | 2.7         | 4.33         | 3.87       | 4.65         | 510     | 22        |
| A1              | 3.67        | 2.84         | 3.62       | 3.02         | 434     | 23        |
| A2              | 3.20        | 2.64         | 3.11       | 2.61         | 434     | 23        |
| B1              | 4.12        | 3.12         | 3.99       | 3.15         | 440     | 23        |
| B2              | 3.36        | 4.24         | 4.66       | 3.67         | 440     | 23        |
| A               | 3.9         | 1.83         | 2.30       | 1.48         | -       | 24        |
| B               | 3.3         | 4.13         | 3.69       | 2.89         | -       | 24        |
| C               | 3.7         | 3.52         | 4.56       | 2.84         | -       | 24        |
| D               | 3.8         | 3.84         | 4.84       | 3.02         | -       | 24        |
| E               | 3.7         | 4.40         | 5.52       | 3.73         | -       | 24        |
| 12              | 3.2         | 4.9          | 4.0        | 4.4          | -       | 25        |
| 13              | 3.9         | 2.1          | 1.9        | 1.7          | -       | 26        |
| 14              | 4.0         | 1.51         | 1.12       | -            | -       | 27        |
| 15              | 3.0         | 5.21         | 3.89       | 5.06         | -       | 28        |
| 16              | 3.4         | 3.95         | 3.98       | 4.51         | -       | 29        |
| 1               | -           | -            | 2.8        | -            | 490     | 30        |
| 2               | -           | -            | 4.0        | -            | 476     | 30        |
| m TPE- m TPE    | 3.9         | 2.1          | 1.9        | 1.7          | 452     | 31        |
| m TPE- p TPE    | 4.1         | 2.8          | 1.9        | 2.0          | 459     | 31        |
| o TPE- m TPE    | 3.7         | 1.8          | 1.4        | 1.4          | 435     | 31        |
| o TPE- p TPE    | 3.9         | 2.2          | 1.7        | 1.8          | 454     | 31        |
| mTPE-2mTPE      | 4.7         | 1.88         | 1.30       | 1.36         | 449     | 32        |
| pTPE-2mTPE      | 3.7         | 4.03         | 2.17       | 2.79         | 471     | 32        |
| mTPE-2pTPE      | 3.5         | 3.67         | 2.09       | 2.90         | 461     | 32        |
| 2,5-mBTPE-TP    | 4.7         | 3.40         | 1.96       | 1.90         | 440     | 33        |
| Py-4 methyl TPE | 4.0         | 5.14         | 2.5        | 3.05         | 472     | 34        |
| Py-4mTPE        | 3.5         | 4.02         | 2.5        | 3.08         | 436     | 34        |
| I               | 6.6         | 3.1          | 3.1        | 1.5          | 454     | 35        |
| II              | 6.2         | 4.1          | 4.1        | 2.1          | 454     | 35        |
| III             | 6.7         | 5.3          | 5.3        | 2.8          | 456     | 35        |
| IV              | 9.3         | 13.1         | 4.9        | 7.5          | 556     | 35        |
| Si-p-TPE        | 3.5         | 7.40         | 2.92       | 5.57         | 512     | 36        |
| Si-tPE          | 3.0         | 8.04         | 3.38       | 6.17         | 488     | 36        |
| Si-mTPE         | 3.7         | 1.39         | 1.21       | 1.18         | 432     | 36        |
| PhQ-CVz         | 3.1         | 5.82         | 4.48       | 5.50         | 462     | 37        |
| M-tDABNA        | 2.7         | 5.7          | 8.6        | 4.0          | 461     | 38        |
| BCz-BFPz        | 3.9         | 2.0          | 4.34       | -            | 436     | 39        |
| C-A-C           | 3.7         | -            | 3.24       | -            | 424     | 40        |
| P2              | 4.25        | 1.3          | 3.9        | -            | 401     | 41        |
| Cz-Oxa-BPh      | 3.3         | 1.4          | 4.0        | 1.3          | 423     | 42        |
| TBBA            | 3.2         | 2.52         | 3.2        | 2.73         | 440     | 43        |

## References

- [1] J. Jayabharathi, S. Panimozhi, V. Thanikachalam, *Sci Rep.* 2020, **10**, 5114.
- [2] (a) M. J. Frisch, G. W. Trucks, H. B. Schlegel, G. E. Scuseria, M. A. Robb, J. R. Cheeseman, G. Scalmani, V. Barone, B. Mennucci, G. A. Petersson, H. Nakatsuji, M. Caricato, X. Li, H. P. Hratchian, A. F. Izmaylov, J. Bloino, G. Zheng, J. L. Sonnenberg, M. Hada, M. Ehara, K. Toyota, R. Fukuda, J. Hasegawa, M. Ishida, T. Nakajima, Y. Honda, O. Kitao, H. Nakai, T. Vreven, J. A. Montgomery, Jr., J. E. Peralta, F. Ogliaro, M. Bearpark, J. J. Heyd, E. Brothers, K. N. Kudin, V. N. Staroverov, R. Kobayashi, J. Normand, K. Raghavachari, A. Rendell, J. C. Burant, S. S. Iyengar, J. Tomasi, M. Cossi, N. Rega, J. M. Millam, M. Klene, J. E. Knox, J. B. Cross, V. Bakken, C. Adamo, J. Jaramillo, R. Gomperts, R. E. Stratmann, O. Yazyev, A. J. Austin, R. Cammi, C. Pomelli, J. W. Ochterski, R. L. Martin, K. Morokuma, V. G. Zakrzewski, G. A. Voth, P. Salvador, J. J. Dannenberg, S. Dapprich, A. D. Daniels, O. Farkas, J. B. Foresman, J. V. Ortiz, J. Cioslowski and D. J. Fox, Gaussian, Inc., Wallingford CT (Revision A.02), *Gaussian, Inc., Wallingford, CT.* 2009. (b) T. Lu, F. Chen, *J. Comput. Chem.* 2012, **33**, 580.
- [3] R. L. Martin, *J. Chem. Phys.* 2003, **118**, 4775.
- [4] T. Le Bahers, C. Adamo, I. Ciofini, *J. Chem. Theory Comput.* 2011, **7**, 2498.
- [5] S. Tretiak, S. Mukamel, *Chem. Rev.* 2002, **102**, 3171.
- [6] J. Jayabharathi, R. Ramya, V. Thanikachalam, P. Jeeva, E. Sarojpurani, *RSC Adv.* 2019, **9**, 2948.
- [7] H. Liu, Q. Bai, L. Ya, H. Zhan, H. Xu, S. Zhang, W. Li, Y. Gao, J. Li, P. Lu, H. Wang, B. Yang, Y. Ma, *Chem. Sci.* 2015, **6**, 3797.

- [8] Z. Wang, Y. Feng, H. Li, Z. Gao, X. Zhang, P. Lu, P. Chen, Y. Mab, S. Liu, *Phys. Chem. Chem. Phys.* 2014, **16**, 10837.
- [9] Y. F. Chang, H. F. Meng, G. L. Fan, K. T. Wong, H. W. Zan, H. W. Lin, H. L. Huang, S. F. Horn, *Org. Electron.* 2016, **29**, 99.
- [10] Y. Zhang, T. Wai, N. F. Lua, Q. X. Tong, S. L. Lai, M. Y. Chan, H. L. Kwong, C. S. Lee, *Dyes. Pigm.* 2013, **98**, 190.
- [11] G. Li, J. Zhao, D. Zhang, J. Zhu, Z. Shi, S. Tao, Feng Lu, Q. Tong, *New J. Chem.* 2017, **41**, 5191.
- [12] S. Liu, F. He, H. Wang, H. Xu, C. Wang, F. Li, Y. Ma, *J. Mater. Chem.* 2008, **18**, 4802.
- [13] S. Kim, B. Sanyoto, W. T. Park, S. Kim, S. Mandal, J. C. Lim, Y. Y. Noh, J. H. Kim, *Adv. Mater.* 2016, **28**, 10149.
- [14] X. L. Li, X. Ouyang, D. Chen, X. Cai, M. Liu, Z. Ge, Y. Cao, S. J. Su, *Nanotechnol.* 2016, **27**, 124001.
- [15] J. Jayabharathi, S. Sivaraj, V. Thanikachalam, J. Anudeebhana, *Adv. Mater.* 2021, **2**, 6388.
- [16] H. Zhang, A. Li, G. Li, B. Li, Z. Wang, S. Xu, W. Xu, B. Z. Tang, *Adv. Optical Mater.* 2020, **14**, 1902195.
- [17] H. Zhang, B. Zhang, Y. Zhang, Z. Xu, H. Wu, P. A. Yin, Z. Wang, Z. Zhao, D. Ma, B. Z. Tang, *Adv. Funct. Mater.* 2020, **30**, 2002323.
- [18] J. Jayabharathi, S. Thilagavathy, V. Thanikachalam, *Mater. Adv.* 2021, **2**, 5160.
- [19] J. Shi, L. Xu, X. Lv, Q. Ding, W. Li, Q. Sun, S. Xue, W. Yang, *Dyes Pigm.* 2019, **161**, 97.
- [20] T. Jadhav, J. M. Choi, B. Dhokale, S. M. Mobin, J. Y. Lee, R. Misra, *J. Phys. Chem. C* 2016, **120**, 18487.
- [21] T. Jadhav, J. M. Choi, J. Y. Lee, B. Dhokale, R. Misra, *Org. Electron.* 2016, **37**, 448.

- [22] Z. Qiu, Z. Yang, W. C. Chen, L. Xing, S. Hu, S. Ji, Q. Yang, N. Cai, X. Ouyang, Y. Huo, *J. Mat. Chem. C* 2020, **8**, 4139.
- [23] A. Islam, Q. Wang, L. Zhang, T. Lei, L. Hong, R. Yang, Z. Liu, R. Peng, L. S. Liao, Z. Ge, *Dyes Pigm.* 2017, **17**, 30335.
- [24] C. Li, J. Wei, J. Han, Z. Li, X. Song, Z. Zhang, J. Zhang, Y. Wang, *J. Mat. chem., C* 2016, **4**, 10120.
- [25] W. Qin, Z. Y. Yang, Y. B. Jiang, J. W. Y. Lam, G. D. Liang, H. S. Kwok, B. Z. Tang, *Chem. Mater.* 2015, **27**, 3892.
- [26] J. Huang, N. Sun, Y. Dong, R. Tang, P. Lu, P. Cai, Q. Li, D. Ma, J. Qin, Z. Li, *Adv. Funct. Mater.* 2013, **23**, 2329.
- [27] X. Tang, L. Yao, H. Liu, F. Shen, S. Zhang, H. Zhang, P. Lu, Y. Ma, *Chem. Eur. J.* 2014, **20**, 7589.
- [28] X. Zhan, Z. Wu, Y. Lin, Y. Xie, Q. Peng, Q. Li, D. Ma, Z. Li, *Chem. Sci.* 2016, **7**, 4355.
- [29] X. Zhan, N. Sun, Z. Wu, J. Tu, L. Yuan, X. Tang, Y. J. Xie, Q. Peng, Y. Dong, Q. Li, D. Ma, Z. Li, *Chem. Mater.* 2015, **27**, 1847.
- [30] A. Ekbote, S. H. Han, T. Jadhav, S. M. Mobin, J. Y. Lee, R. Misra, *J. Mater. Chem. C* 2018, **6**, 2077.
- [31] J. Huang, N. Sun, Y. Dong, R. Tang, P. Lu, P. Cai, Q. Li, D. Ma, J. Qin, Z. Li, *Adv. Funct. Mater.* 2013, **23**, 2329.
- [32] J. Huang, N. Sun, J. Wang, R. Tang, X. Li, J. Dong, Q. Li, D. Ma, Z. Li, *Isr. J. Chem.* 2014, **54**, 931.
- [33] Z. Ruan, L. Li, C. Wang, Y. Xie, Q. Hu, Q. Peng, S. Ye, Q. Li, Z. Li, *small.* 2016, **21**, 6623.
- [34] J. Yang, J. Huang, N. Sun, Q. Peng, Q. Li, D. Ma, Z. Li, *Chem. Eur. J.* 2015, **21**, 6862.

- [35] P. I. Shih, C. Y. Chuang, C. H. Chien, E. W. G. Diau, C. F. Shu, *Adv. Funct. Mater.* 2007, **17**, 3141.
- [36] J. Yang, N. Sun, J. Huang, Q. Li, Q. Peng, X. Tang, Y. Dong, D. Ma, Z. Li, *J. Mat. Chem., C* 2015, **3**, 2624.
- [37] S. J. Lee, J. S. Park, K. J. Yoon, Y. I. Kim, S. H. Jin, S. K. Kang, Y. S. Gal, S. Kang, J. Y. Lee, J. W. Kang, S. H. Lee, H. D. Park, J. J. Kim, *Adv. Funct. Mater.* 2008, **18**, 3922.
- [38] H. Lim, S. J. Woo, Y. H. Ha, Y. H. Kim, J. J. Kim, *Adv. Mat.* 2022, **34**, 2100161.
- [39] C. C. Huang, M. M. Xue, F. P. Wu, Y. Yuan, L. S. Liao, M. K. Fung, *Molecules.* 2019, **24**, 353.
- [40] A. Pachariyangkun, P. Wongkaew, T. Sudyoasuk, S. Namuangruk, V. Promarak, *Dyes and Pigments*, 2021, **186**, 109065.
- [41] J. Santos, J. H. Cook, H. A. Al-Attar, A. P. Monkman, M. R. Bryce, *J. Mater. Chem. C*, 2015, **3**, 2479.
- [42] Y. Tan, Z. Wang, C. Wei, Z. Liu, Z. Bian, C. Huang, *Org. Electron.* 2019, **69**, 77.
- [43] Z. Li, G. Gan, Z. Ling, K. Guo, C. Si, X. Lv, H. Wang, B. Wei, Y. Hao, *Org. Electron.* 2019, **66**, 24.
